# Supplementary material
Source: MDPI journal article supplement (https://www.mdpi.com/2071-1050/12/13/5461)
Supplement: s1 [file s1]

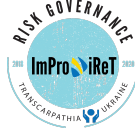

## ImProDiReT Risk Evaluation Approach for Solotvyno Municipality

Română

### Informed Consent Form

#### Q1.1. Denumirea instituției de învățământ:

- ☐ școala generală cu predare în limba română
- ☐ școala generală cu predare în limba ucraineană
- ☐ școala generală în numele lui Ianoș Boio cu predare în limba maghiară
- ☐ liceul român

#### Q1.2. Numele, Prenumele profesorului

#### Q1.3. Tipul participantului:

- ☐ profesorul
- ☐ vecin 1
- ☐ familia elevului
- ☐ vecin 2

#### Q1.4.

Înainte de a fi de acord să participați la sondaj, este important să citiți următoarea explicație. După ce ați citit explicațiile pentru sondaj, răspundeți la următoarele întrebări cu o notă „Da” sau „Nu”.

Denumirea și detaliile sondajului: Evaluarea localității Solotvyno (Slatina). Acest studiu privind riscul de dezastre face parte dintr-un proiect mai mare al Uniunii Europene „Îmbunătățirea reducerii riscurilor de dezastre naturale în regiunea Transcarpatia. Ucraina- Improdirect( Cercetătorul principal ( în continuare ,CP): profesorul BartelVandeWalle, EU DG ECHO proiectul 783232 în gestionarea riscurilor)

Cercetătorii: Dr. AbbyMurichoOnencan ( în continuare Cercetător), Departamentul de sisteme multifactoriale, Secția de analiză a politicilor, Facultatea de Tehnologie, Politici și Management,Universitatea de tehnologie Delft, Olanda.

Scopul gestionării :Scopul sondajului este de a evalua ce putem face pentru siguranța comunității din Solotvyno (Slatina). Datele vor furniza contribuții la planul de acțiune comunitar pentru a reduce riscul de surpări al terenurilor în apropierea minelor de sare.

Confidențialitate și gestionarea datelor: Vom colecta evaluarea riscurilor, pregătirea pentru dezastre naturale și vom identifica zonele periculoase.În plus, geo-datele vor fi colectate pentru a cartografia nivelulul de risc al dezastrului. Prelucrarea și stocarea datelor dvs. vor fi gestionate în conformitate cu Regulamentul UE 2016/679 „privind Regulamentul general privind protecția datelor” Aveți dreptul de a solicita accesul la date, de a schimba sau șterge datele personale în orice moment. Orice informații personale, cum ar fi nume, identități, locații, vor fi modificate sau șterse pentru a asigura anonimatul.Datele anonime pot fi utilizate pentru cercetare și publicații pe durata proiectului. Durata proiectului (1 septembrie 2019 - 29 februarie 2020), informațiile personale vor fi disponibile numai membrilor proiectului (PI Investigator).Datele vor fi stocate în Olanda și nu vor fi niciodată puse la dispoziția terților. După proiect, datele anonime și rezultatele cercetării (nu personale) vor fi arhivate timp de 10 ani și vor fi accesibile oricui.

Explicații: Veți fi invitat să răspundeți la întrebări cu privire la atitudinea dvs. față de riscul surpărilor în Solotvyno (Slatina). Nivelul dvs. de pregătire și ce legătură aveți dvs. cu acest teritoriu. Durata chestionarului este de 15-30 de minute.

Riscul: principalul risc de a participa la studiu este utilizarea datelor dvs. personale în timpul procesării și stocării informațiilor de către o altă persoană până la finalizarea studiului.Cercetătorul a redus la minimum riscurile utilizând doar date anonime care nu vă pot fi legate. Prin urmare, riscurile de interceptare a datelor sunt minime. Cu alte cuvinte, participarea la un sondaj este sigură pentru participanți. Participarea la acest sondaj nu vă va dăuna sănătății.

Întrebarea: Orice întrebări despre cercetare și chestionare și / sau în caz de apar probleme din cauza cercetare pot fi adresate cercetătorului.Abbby M. Onencan, TU DelftFacultyofTPM, Jaffalaan 5, 2628 BXdelft, Email: A.M.Onencan@tudelft.nl.

|                                                                                                                                                                                                                                                                                                         | Da                    | Nu                    |
|---------------------------------------------------------------------------------------------------------------------------------------------------------------------------------------------------------------------------------------------------------------------------------------------------------|-----------------------|-----------------------|
| 1. Am făcut cunoștință cu informația , sau am citit informațiile de mai sus. Am avut ocazia să pun întrebări legate de informațiile anterioare de consultanță, iar la oricare dintre întrebările pe care le-am pus, am primit un răspuns corespunzător.                                                 | <input type="radio"/> | <input type="radio"/> |
| 2. Accept benevol acest sondaj. Am înțeles pe deplin că, în orice moment, pot refuza să răspund la următoarele întrebări și să refuz să continui acest curs fără a oferi nicio explicație sau motiv.                                                                                                    | <input type="radio"/> | <input type="radio"/> |
| 3. Sunt pe deplin conștient de riscurile pe care le implică stocarea și procesarea datelor mele personale furnizate pe parcursul acestui sondaj. În plus, am înțeles că cercetătorii care efectuează acest sondaj ar trebui să reducă la minimum șansele oricăror riscuri asociate cu datele personale, | <input type="radio"/> | <input type="radio"/> |

|                                                                                                                                                                                                                                                       | Da                    | Nu                    |
|-------------------------------------------------------------------------------------------------------------------------------------------------------------------------------------------------------------------------------------------------------|-----------------------|-----------------------|
| luând măsuri adecvate și fiabile pentru a prelucra, păstra și oferi acces la informații sensibile, cât în timpul atât și după studiu                                                                                                                  | <input type="radio"/> | <input type="radio"/> |
| 4. Am înțeles că informațiile anonime (sondaje anonime, transcrieri) furnizate de mine vor fi utili-zate pentru publicarea viitoare în activități de cercetare și conexe, lucrări de cercetare și publi-cații (site-uri web, rapoarte, bloguri etc.). | <input type="radio"/> | <input type="radio"/> |
| 5. Sunt pe deplin conștient de faptul că informațiile personale despre mine (locul de reședință și alte date care pot fi utilizate pentru identificarea persoanei mele) nu vor fi partajate cercetătorilor și altor probe.                            | <input type="radio"/> | <input type="radio"/> |

Q1.5. Semnătura

×

SIGN  
HERE

clear

Demographics

Q2.1. Vârsta

- ☐ Până la 18

☐ 18-24

☐ 25-34

☐ 35-44

☐ 45-54
- ☐ 55-64

☐ 65-74

☐ 75-84

☐ Alta

Q2.2. Sexul

- ☐ Masc
- ☐ Fem.

Q2.3. Studiile

- ☐ fără studii licență

☐ școală primară

☐ școală generală

☐ colegiul
- ☐ licență

☐ masterat

☐ doctorală

☐ postdoctorală

Q2.4. Starea civilă

- ☐ necăsătorit (ă)

☐ căsătorit(ă)
- ☐ divorțat (ă)

☐ văduv(ă)

Q2.5.  
Credința

- ☐ nu sunt decis

☐ ateist

☐ ortodox

☐ romano-catolic

☐ protestant

☐ protestant

☐
- ☐ budist

☐ păgân

☐ greco-catolic

☐ martor a lui Iehova

☐ laic

☐ Altele, vă rugăm să specificați

Q2.6. Etnia

☐ Ucrainean

☐ Rutean

☐ Maghiar

☐ Român

☐ Rom(Tigian)

☐ Rus

☐ Slovak

☐ Ceh

☐ Neamț

☐ Altele, vă rugăm să specificați

Q2.7. Venitul anual

☐ Scăzut ( sub 1,90 USD pezi )

☐ Mijlociu

☐ Înalt

Q2.8. Domiciliul (Denumirea străzii)

Q2.9. Mai jos este o hartă zonată, vă rugăm să indicați în ce zonă locuiți, lucrați, copiii dvs. merg la școală, mergeți la biserică, aveți o afacere sau închiriați o casă.

Map of Solotvyno (Slatina) showing various zones:

- 1. Magura Mountain Slopes
- 2. Terrace Slopes
- 3. Mine 9 Area
- 4. Mine 8 Area
- 5. Mine 7 Area
- 6. Salt Lake Area
- 7. Black Moor Area

Scale: 0 to 1 km. North arrow.

|                                                                 | Locuiți                  | Munciiți                 | Copii merg la școală     | Frecvență biserică       |
|-----------------------------------------------------------------|--------------------------|--------------------------|--------------------------|--------------------------|
| 1. Teritoriul în jurul Măgurei                                  | <input type="checkbox"/> | <input type="checkbox"/> | <input type="checkbox"/> | <input type="checkbox"/> |
| 2. Teritoriul și casele de-a lungul traseului ( str. Sportivna) | <input type="checkbox"/> | <input type="checkbox"/> | <input type="checkbox"/> | <input type="checkbox"/> |
| 3. Teritoriul în jurul minei №9                                 | <input type="checkbox"/> | <input type="checkbox"/> | <input type="checkbox"/> | <input type="checkbox"/> |
| 4. Teritoriul în jurul minei №8                                 | <input type="checkbox"/> | <input type="checkbox"/> | <input type="checkbox"/> | <input type="checkbox"/> |
| 5. Teritoriul în jurul minei №7                                 | <input type="checkbox"/> | <input type="checkbox"/> | <input type="checkbox"/> | <input type="checkbox"/> |
| 6. Teritoriul lacurilor sărate                                  | <input type="checkbox"/> | <input type="checkbox"/> | <input type="checkbox"/> | <input type="checkbox"/> |
| 7. Blocurile cu cinci etaje 1,2,3 de pe str. Evropeiska         | <input type="checkbox"/> | <input type="checkbox"/> | <input type="checkbox"/> | <input type="checkbox"/> |
| 8. Altele, vă rugăm să specificați                              | <input type="checkbox"/> | <input type="checkbox"/> | <input type="checkbox"/> | <input type="checkbox"/> |
| 9. Altele, vă rugăm să specificați                              | <input type="checkbox"/> | <input type="checkbox"/> | <input type="checkbox"/> | <input type="checkbox"/> |
| 10. Altele, vă rugăm să specificați                             | <input type="checkbox"/> | <input type="checkbox"/> | <input type="checkbox"/> | <input type="checkbox"/> |

Household

Q3.1. De câți ani locuiți în Solotvyno(Slatina)?

Q3.2. Tipul locuinței

☐ Proprietat

☐ Închiriată

☐ În ipotecă

☐ Altele, vă rugăm să specificați

## Q3.3. Câte persoane sunt în familia dvs?

## Q3.4. Tipul familiei

- ☐ Completă  
☐ Cu mulți copii  
☐ Crescut de un părinte  
☐ Fără copii  
☐  Alte, vă rugăm să specificați

## Q3.5. Modul de trai

- ☐ Locuiești singur  
☐ Locuiești cu partenerul  
☐ Familie completă  
☐ Locuiesc câteva familii în casă  
☐ Familia locuiește împreună cu părinții vârstnici  
☐  Alte, vă rugăm să specificați

## Q3.6. Are cineva din familia dvs. dizabilități fizice.?

- ☐ Da  
☐ Nu

## Place Attachment Scale

## Q4.1. Vă rugăm să indicați cât sunteți de acord sau nu sunteți de acord cu aceste afirmații, Soltvino (Slatina) este importantă pentru mine, deoarece

|                                                                                                                       | Nu sunt complet       | Nu sunt de acord      | Indiferent            | De acord              | Total de acord        |
|-----------------------------------------------------------------------------------------------------------------------|-----------------------|-----------------------|-----------------------|-----------------------|-----------------------|
| 1. Fiind orașul de frontieră Soltvino(Slatina) are multe oportunități                                                 | <input type="radio"/> |
| 2. În acest oraș eu am mulți prieteni care imi pot da ajutor financiar                                                | <input type="radio"/> |
| 3. Aici mă pot împrumuta cu ușurință.                                                                                 | <input type="radio"/> |
| 4. Nu mă gândesc la alte locuri, deoarece aici este un teren foarte fertil.                                           | <input type="radio"/> |
| 5. Această localitate îmi oferă mai multe oportunități decât orice alt loc din Ucraina.                               | <input type="radio"/> |
| 6. Aici bine se dezvoltă turizmul                                                                                     | <input type="radio"/> |
| 7. Calitatea sării în Slatina este mai bună, decât în alte orașe din Ucraina                                          | <input type="radio"/> |
| 8. Am o casă construită aici                                                                                          | <input type="radio"/> |
| 9. Strămoșii și părinții mei au trăit aici și sunt înmormântați aici                                                  | <input type="radio"/> |
| 10. Aici oamenii mă cunosc                                                                                            | <input type="radio"/> |
| 11. Strămoșii mei au foat personalități cunoscute în Slatina.                                                         | <input type="radio"/> |
| 12. Găsesc aici memoria strămoșilor și a părinților mei.                                                              | <input type="radio"/> |
| 13. Membrii familiei mele pot lucra în Cehia, Rusia, Ungaria și alte orașe din Ucraina, rămânând rezidenți în Slatin. | <input type="radio"/> |
| 14. Datorită originii etnice, mă simt mai bine aici decât în alte locuri din Ucraina.                                 | <input type="radio"/> |
| 15. Nu mă pot simți satisfăcut fără să vizitez biserica o dată pe săptămână.                                          | <input type="radio"/> |
| 16. Festivalurile sunt organizate aici sunt foarte importante pentru mine.                                            | <input type="radio"/> |
| 17. Îmi place varietatea de limbi, școli și biserici.                                                                 | <input type="radio"/> |
| 18. Locuind pe pământul strămoșilor mei, eu pot primi orice sprijin.                                                  | <input type="radio"/> |

## Land Subsidence Preparedness Scale

Q5.1. Dacă aveți următoarele lucruri la îndemână în caz de alunecări de teren? Vă rugăm să bifați fiecare punct „da”, „nesigur”, „nu”.

|                                                                                                                                                  | Da                    | Nesigur               | Nu                    |
|--------------------------------------------------------------------------------------------------------------------------------------------------|-----------------------|-----------------------|-----------------------|
| 1. Actele importante păstrate într-o geantă sau într-un seif.                                                                                    | <input type="radio"/> | <input type="radio"/> | <input type="radio"/> |
| 2. Articole de uz casnic depozitate în seifuri sau seifuri portabile.                                                                            | <input type="radio"/> | <input type="radio"/> | <input type="radio"/> |
| 3. Radioul care funcționează, este în stare bună.                                                                                                | <input type="radio"/> | <input type="radio"/> | <input type="radio"/> |
| 4. Lanterne / lanterne de buzunar (cu încărcare suficientă, baterii, lumânări, generatoare portabile, complet stocate .                          | <input type="radio"/> | <input type="radio"/> | <input type="radio"/> |
| 5. Un set de accesorii de urgență, echipat pentru transportare ușor într-un rucsac.                                                              | <input type="radio"/> | <input type="radio"/> | <input type="radio"/> |
| 6. Apă potabilă (curată).                                                                                                                        | <input type="radio"/> | <input type="radio"/> | <input type="radio"/> |
| 7. Kit portabil de prim ajutor                                                                                                                   | <input type="radio"/> | <input type="radio"/> | <input type="radio"/> |
| 8. Fondurile de rezervă necesare desemnat pentru utilizare în situații de urgență, cum ar fi evacuarea de urgență și neașteptată .               | <input type="radio"/> | <input type="radio"/> | <input type="radio"/> |
| 9. Polița de asigurare (bunuri, sănătate, viață este calculată și pentru daunele cauzate de alunecările de teren sau de consecințele acestora)). | <input type="radio"/> | <input type="radio"/> | <input type="radio"/> |
| 10. Aranjament de evacuare de urgență cu una dintre rudele care nu locuiesc în Slatina (Solotvyno)                                               | <input type="radio"/> | <input type="radio"/> | <input type="radio"/> |

Q5.2. Vă rugăm să indicați nivelul de dificultate în pregătirea bunurilor personale și a familiei pentru situații neașteptate? Opțiunile de răspuns variază de la „deloc dificil” la „extrem de dificil”

|                                                                                                                                                  | Deloc dificil         | Puțin dificil         | În oarecare măsură difici | Foarte dificil        | Extrem de dificil     |
|--------------------------------------------------------------------------------------------------------------------------------------------------|-----------------------|-----------------------|---------------------------|-----------------------|-----------------------|
| 1. Actele importante păstrate într-o geantă sau într-un seif.                                                                                    | <input type="radio"/> | <input type="radio"/> | <input type="radio"/>     | <input type="radio"/> | <input type="radio"/> |
| 2. Articole de uz casnic depozitate în seifuri sau seifuri portabile.                                                                            | <input type="radio"/> | <input type="radio"/> | <input type="radio"/>     | <input type="radio"/> | <input type="radio"/> |
| 3. Radioul care funcționează, este în stare bună.                                                                                                | <input type="radio"/> | <input type="radio"/> | <input type="radio"/>     | <input type="radio"/> | <input type="radio"/> |
| 4. Lanterne / lanterne de buzunar (cu încărcare suficientă, baterii, lumânări, generatoare portabile, complet stocate.                           | <input type="radio"/> | <input type="radio"/> | <input type="radio"/>     | <input type="radio"/> | <input type="radio"/> |
| 5. Un set de accesorii de urgență, echipat pentru transportare ușor într-un rucsac.                                                              | <input type="radio"/> | <input type="radio"/> | <input type="radio"/>     | <input type="radio"/> | <input type="radio"/> |
| 6. Apă potabilă (curată).                                                                                                                        | <input type="radio"/> | <input type="radio"/> | <input type="radio"/>     | <input type="radio"/> | <input type="radio"/> |
| 7. Kit portabil de prim ajutor                                                                                                                   | <input type="radio"/> | <input type="radio"/> | <input type="radio"/>     | <input type="radio"/> | <input type="radio"/> |
| 8. Fondurile de rezervă necesare desemnat pentru utilizare în situații de urgență, cum ar fi evacuarea de urgență și neașteptată .               | <input type="radio"/> | <input type="radio"/> | <input type="radio"/>     | <input type="radio"/> | <input type="radio"/> |
| 9. Polița de asigurare (bunuri, sănătate, viață este calculată și pentru daunele cauzate de alunecările de teren sau de consecințele acestora)). | <input type="radio"/> | <input type="radio"/> | <input type="radio"/>     | <input type="radio"/> | <input type="radio"/> |
| 10. Aranjament de evacuare de urgență cu una dintre rudele care nu locuiesc în Slatina (Solotvyno).                                              | <input type="radio"/> | <input type="radio"/> | <input type="radio"/>     | <input type="radio"/> | <input type="radio"/> |

Q5.3.

Vă rugăm să indicați în ce măsură familia dvs. este pregătită pentru orice riscuri sau amenințări neprevăzute, cum ar fi catastrofele naturale. Bifați biluța care corespunde răspunsului tău

|                                                                                                                                                                                                                    | Da                    | Nesigur               | Nu                    |
|--------------------------------------------------------------------------------------------------------------------------------------------------------------------------------------------------------------------|-----------------------|-----------------------|-----------------------|
| 1.Știți ce agenție guvernamentală trebuie să contactați în cazul alunecărilor de teren.?                                                                                                                           | <input type="radio"/> | <input type="radio"/> | <input type="radio"/> |
| 2. Știți ce semne de avertizare sau alarme sunt utilizate în Solotvyno(Slatina)?                                                                                                                                   | <input type="radio"/> | <input type="radio"/> | <input type="radio"/> |
| 3. Participați la discuții publice pe probleme legate de prevenirea alunecărilor de teren ?                                                                                                                        | <input type="radio"/> | <input type="radio"/> | <input type="radio"/> |
| 4.. Asistați la întâlniri legate de problema alunecărilor de teren, inițiate de școli, organizații guvernamentale, administrații locale, guvern?                                                                   | <input type="radio"/> | <input type="radio"/> | <input type="radio"/> |
| 5. Va-ți făcut de cunoștință dvs și membrii familiei dvs cu planul de acțiuni în cazul apariției situației de urgență în timpul aflării dvs acasă, la serviciu, la școală ,la grădiniță sau în azilul de bătrâni ? | <input type="radio"/> | <input type="radio"/> | <input type="radio"/> |
| 6. Ați pregătit proprietatea pentru a reduce daunele cauzate de alunecările de teren sau efectele acestora?                                                                                                        | <input type="radio"/> | <input type="radio"/> | <input type="radio"/> |
| 7. Dumneavoastră sau cineva din familia dvs. sunteți puși la cunoștință cu metodele și modalitățile de acordare a primului ajutor.                                                                                 | <input type="radio"/> | <input type="radio"/> | <input type="radio"/> |
| 8 Știi cum să amenajați un adăpost temporar.?                                                                                                                                                                      | <input type="radio"/> | <input type="radio"/> | <input type="radio"/> |

Q5.4. Vă rugăm să evaluați gradul de dificultăți de pregătire a familiei pentru fiecare dintre următoarele întrebări. Opțiunile de răspuns variază de la „nu este dificil” la „extrem de dificil”.

|                                                                                             | Deloc dificil         | Puțin dificil         | În oarecare măsură difici | Foarte dificil        | Extrem de dificil     |
|---------------------------------------------------------------------------------------------|-----------------------|-----------------------|---------------------------|-----------------------|-----------------------|
| 1.Știți ce agenție guvernamentală trebuie să contactați în cazul alunecărilor de teren.?    | <input type="radio"/> | <input type="radio"/> | <input type="radio"/>     | <input type="radio"/> | <input type="radio"/> |
| 2. Știți ce semne de avertizare sau alarme sunt utilizate în Solotvyno(Slatina)?            | <input type="radio"/> | <input type="radio"/> | <input type="radio"/>     | <input type="radio"/> | <input type="radio"/> |
| 3. Participați la discuții publice pe probleme legate de prevenirea alunecărilor de teren ? | <input type="radio"/> | <input type="radio"/> | <input type="radio"/>     | <input type="radio"/> | <input type="radio"/> |

|                                                                                                                                                                                                                    | Deloc dificil         | Puțin dificil         | În oarecare măsură dificil | Foarte dificil        | Extrem de dificil     |
|--------------------------------------------------------------------------------------------------------------------------------------------------------------------------------------------------------------------|-----------------------|-----------------------|----------------------------|-----------------------|-----------------------|
| 4.. Asistați la întâlniri legate de problema alunecărilor de teren, inițiate de școli, organizații guvernamentale, administrații locale, guvern?                                                                   | <input type="radio"/> | <input type="radio"/> | <input type="radio"/>      | <input type="radio"/> | <input type="radio"/> |
| 5. Va-ți făcut de cunoștință dvs și membrii familiei dvs cu planul de acțiuni în cazul apariției situației de urgență în timpul aflării dvs acasă, la serviciu, la școală, la grădiniță sau în azilul de bătrâni ? | <input type="radio"/> | <input type="radio"/> | <input type="radio"/>      | <input type="radio"/> | <input type="radio"/> |
| 6. Ați pregătit proprietatea pentru a reduce daunele cauzate de alunecările de teren sau efectele acestora?                                                                                                        | <input type="radio"/> | <input type="radio"/> | <input type="radio"/>      | <input type="radio"/> | <input type="radio"/> |
| 7. Dumneavoastră sau cineva din familia dvs. sunteți puși la cunoștință cu metodele și modalitățile de acordare a primului ajutor.                                                                                 | <input type="radio"/> | <input type="radio"/> | <input type="radio"/>      | <input type="radio"/> | <input type="radio"/> |
| 8 Știi cum să amenajați un adăpost temporar?                                                                                                                                                                       | <input type="radio"/> | <input type="radio"/> | <input type="radio"/>      | <input type="radio"/> | <input type="radio"/> |

#### Solotvyno Community-based Risk Evaluation

Q6.1.

În opinia dumneavoastră, cum ați aprecia nivelul de risc pentru persoanele care locuiesc sau sunt antreprenori cartiere din Slatina? (marcate pe harta la întrebarea 2.8.)

|                                                             | Strămutarea (urgentă catastrofă) | critică (nlocuirea în asemenea localitate este foarte riscantă și nu se recomandă) | ridicat (localitatea are nevoie de măsuri pentru atenuarea riscurilor potențiale) | Minimal minim (periculos doar în anumite părți ale zonei care poate fi ocolit sau reparat) (nesemnificativ (în general sigur)) | nesemnificativ (în general sigur) |
|-------------------------------------------------------------|----------------------------------|------------------------------------------------------------------------------------|-----------------------------------------------------------------------------------|--------------------------------------------------------------------------------------------------------------------------------|-----------------------------------|
| 1. Teritoriul din jurul Măgurei                             | <input type="radio"/>            | <input type="radio"/>                                                              | <input type="radio"/>                                                             | <input type="radio"/>                                                                                                          | <input type="radio"/>             |
| 2. Teritoriul și casele de-alungul traseului (str.Sporivna) | <input type="radio"/>            | <input type="radio"/>                                                              | <input type="radio"/>                                                             | <input type="radio"/>                                                                                                          | <input type="radio"/>             |
| 3. Teritoriul din jurul minei №9                            | <input type="radio"/>            | <input type="radio"/>                                                              | <input type="radio"/>                                                             | <input type="radio"/>                                                                                                          | <input type="radio"/>             |
| 4. Teritoriul în jurul minei №8                             | <input type="radio"/>            | <input type="radio"/>                                                              | <input type="radio"/>                                                             | <input type="radio"/>                                                                                                          | <input type="radio"/>             |
| 5. Teritoriul în jurul minei №7                             | <input type="radio"/>            | <input type="radio"/>                                                              | <input type="radio"/>                                                             | <input type="radio"/>                                                                                                          | <input type="radio"/>             |
| 6. Teritoriul Lacurilor Sărate                              | <input type="radio"/>            | <input type="radio"/>                                                              | <input type="radio"/>                                                             | <input type="radio"/>                                                                                                          | <input type="radio"/>             |
| 7. Blocurile cu cinci etaje 1,2,3 pe strada Evropeiska      | <input type="radio"/>            | <input type="radio"/>                                                              | <input type="radio"/>                                                             | <input type="radio"/>                                                                                                          | <input type="radio"/>             |

Q6.2. În opinia dumneavoastră, ce este posibil să se întâmple dacă alunecările de teren continuă să apară și efectele acestora rămân în afara atenției ?

|                                                                                                   | Probabilitate înaltă  | Posibil               | Puți probabil         | Nu-i posibil          | Deloc nu-i posibil    |
|---------------------------------------------------------------------------------------------------|-----------------------|-----------------------|-----------------------|-----------------------|-----------------------|
| 1. Pierderi de viață/vieți                                                                        | <input type="radio"/> |
| 2. Pierderi grele (printre populația locală sau turiști)                                          | <input type="radio"/> |
| 3. Prejudicii economice deteriorarea caselor/ruinarea și infrastructurii )                        | <input type="radio"/> |
| 4. Lipsa apei potabile nimicirea resurselor de apă potabilă)                                      | <input type="radio"/> |
| 5. Închiderea școlilor (ucrainene, românești, magheare ș.a..)                                     | <input type="radio"/> |
| 6. Salinizarea terenurilor (utilizate pentru activități agricole)                                 | <input type="radio"/> |
| 7. Salinizarea râurilor Tisa și Dunărea (înălțimile inferioare)                                   | <input type="radio"/> |
| 8. Pierderea locurilor de muncă                                                                   | <input type="radio"/> |
| 9. Apariția persoanelor fără adăpost.)                                                            | <input type="radio"/> |
| 10. Închiderea infrastructurii de transport (distrugerea căilor ferate și a drumurilor principale | <input type="radio"/> |
| 11. Distrugerea conductei de gaze)                                                                | <input type="radio"/> |
| 12. Dfclinul raioanelor Teaciv și Rahiv (distrugerea stațiilor electrice)                         | <input type="radio"/> |

Q6.3.

Să presupunem că vi s-a acordat dreptul de proprietate asupra unei locuințe în oricare dintre următoarele zone scrise mai jos: Pe baza cunoașterii și înțelegerii situației din Slatina, ce vei alege? Pentru fiecare opțiune, selectați una dintre cele trei aprobări ale aprobării „A”: să acceptați dreptul de proprietate asupra casei și să vă mutați în noul loc de reședință de urgență „B”: să acceptați dreptul de proprietate numai după dvs.

|                                                             | A prelua dreptul la proprietate a casei și urgent a se muta în locul nou | A prelua dreptul la proprietate la doar după ce vă convingeți locul nou se află în siguranță | Refuzați la strămutare |
|-------------------------------------------------------------|--------------------------------------------------------------------------|----------------------------------------------------------------------------------------------|------------------------|
| 1. Teritoriul din jurul Măgurei                             | <input type="radio"/>                                                    | <input type="radio"/>                                                                        | <input type="radio"/>  |
| 2. Teritoriul și casele de-alungul traseului (str.Sporivna) | <input type="radio"/>                                                    | <input type="radio"/>                                                                        | <input type="radio"/>  |
| 3. Teritoriul din jurul minei №9                            | <input type="radio"/>                                                    | <input type="radio"/>                                                                        | <input type="radio"/>  |
| 4. Teritoriul în jurul minei №8                             | <input type="radio"/>                                                    | <input type="radio"/>                                                                        | <input type="radio"/>  |
| 5. Teritoriul în jurul minei №7                             | <input type="radio"/>                                                    | <input type="radio"/>                                                                        | <input type="radio"/>  |

|                                                          | A prelua dreptul la proprietate a casei și<br>urgent a se muta în locul nou | A prelua dreptul la proprietate la doar după<br>ce vă convingeți locul nou se află în<br>siguranță | Refuzați la strămutare |
|----------------------------------------------------------|-----------------------------------------------------------------------------|----------------------------------------------------------------------------------------------------|------------------------|
| 6. Teritoriul Lacurilor Sărate                           | <input type="radio"/>                                                       | <input type="radio"/>                                                                              | <input type="radio"/>  |
| 7. Blocurile cu cinci etaje1,2,3 pe strada<br>Evropeiska | <input type="radio"/>                                                       | <input type="radio"/>                                                                              | <input type="radio"/>  |

## Q6.4.

Presupunem că vi s-a acordat permisiunea de a vă construi propria bază turistică în oricare dintre următoarele zone. Pe baza cunoașterii și înțelegerii situației din Slatina, ce vei alege? Pentru fiecare dintre opțiuni, alegeți una dintre cele trei aprobări - aprobarea „A”: acceptați permisiunea și începeți să vă construiți propria afacere imediat; aprobarea "B": să accepte permisul numai după ce ai verificat personal că zona este sigură pentru construcții și afaceri; Aprobarea C: refuza permisiunea și construcția.

|                                                                | A primi accesul și urgent a începe<br>construcția | A primi aprobarea doar după ce voi fi<br>încrezut de siguranța | A refuza la afacere pe teritoriul acesta |
|----------------------------------------------------------------|---------------------------------------------------|----------------------------------------------------------------|------------------------------------------|
| 1. Teritoriul din jurul Măgurei                                | <input type="radio"/>                             | <input type="radio"/>                                          | <input type="radio"/>                    |
| 2. Teritoriul și casele de-alungul traseului<br>(str.Sporivna) | <input type="radio"/>                             | <input type="radio"/>                                          | <input type="radio"/>                    |
| 3. Teritoriul din jurul minei №9                               | <input type="radio"/>                             | <input type="radio"/>                                          | <input type="radio"/>                    |
| 4. Teritoriul în jurul minei №8                                | <input type="radio"/>                             | <input type="radio"/>                                          | <input type="radio"/>                    |
| 5. Teritoriul în jurul minei №7                                | <input type="radio"/>                             | <input type="radio"/>                                          | <input type="radio"/>                    |
| 6. Teritoriul Lacurilor Sărate                                 | <input type="radio"/>                             | <input type="radio"/>                                          | <input type="radio"/>                    |
| 7. Blocurile cu cinci etaje1,2,3 pe strada<br>Evropeiska       | <input type="radio"/>                             | <input type="radio"/>                                          | <input type="radio"/>                    |

## Q6.5.

Să presupunem că vi s-a acordat permisiunea de a construi o mină de sare și un spital de speleoterapie în oricare dintre următoarele zone. Pe baza cunoașterii și înțelegerii situației din Solotvyna, ce vei alege? Pe baza cunoașterii și înțelegerii situației din Slatina, ce vei alege? Pentru fiecare dintre opțiuni, alegeți una dintre cele trei aprobări - aprobarea „A”: Acceptați permisul, deschideți mină și începeți imediat construcția spitalului; aprobarea "B": să accepte permisiunea numai după ce ai verificat personal că zona este sigură pentru construcție; aprobarea C: refuza permisiunea și construcția

|                                                                | A primi aprobarea a deschide mină Și<br>urgent a începe construcția unui spital | A primi aprobarea doar după ce personal<br>veți fi încrezut că zona respectivă este în<br>siguranță și e bună pentru construcție | Refuzați la afacere pe acest teritoriu |
|----------------------------------------------------------------|---------------------------------------------------------------------------------|----------------------------------------------------------------------------------------------------------------------------------|----------------------------------------|
| 1. Teritoriul din jurul Măgurei                                | <input type="radio"/>                                                           | <input type="radio"/>                                                                                                            | <input type="radio"/>                  |
| 2. Teritoriul și casele de-alungul traseului<br>(str.Sporivna) | <input type="radio"/>                                                           | <input type="radio"/>                                                                                                            | <input type="radio"/>                  |
| 3. Teritoriul din jurul minei №9                               | <input type="radio"/>                                                           | <input type="radio"/>                                                                                                            | <input type="radio"/>                  |
| 4. Teritoriul în jurul minei №8                                | <input type="radio"/>                                                           | <input type="radio"/>                                                                                                            | <input type="radio"/>                  |
| 5. Teritoriul în jurul minei №7                                | <input type="radio"/>                                                           | <input type="radio"/>                                                                                                            | <input type="radio"/>                  |
| 6. Teritoriul Lacurilor Sărate                                 | <input type="radio"/>                                                           | <input type="radio"/>                                                                                                            | <input type="radio"/>                  |
| 7. Blocurile cu cinci etaje1,2,3 pe strada<br>Evropeiska       | <input type="radio"/>                                                           | <input type="radio"/>                                                                                                            | <input type="radio"/>                  |

Q6.6. În opinia dumneavoastră, ce trebuie de făcut pentru a rezolva problema alunecărilor de teren? Pentru fiecare dintre următoarele opțiuni, selectați una dintre cele trei enunțuri - declarația „ A”: prefer implementarea 100%; afirmație "B": preferă înfrumusețarea parțială la unele niveluri, permise; Declarația C: Prefer să nu interferez și să fac modificări în funcție de situația actuală

|                                                                                                             | 100% implementare     | Implementare parțială La anumite<br>niveluri | Nu interferez și nu schimb situația |
|-------------------------------------------------------------------------------------------------------------|-----------------------|----------------------------------------------|-------------------------------------|
| 1. De curățat lacurile sărate                                                                               | <input type="radio"/> | <input type="radio"/>                        | <input type="radio"/>               |
| 2. Întărirea pereților de sprijin.                                                                          | <input type="radio"/> | <input type="radio"/>                        | <input type="radio"/>               |
| 3. Accelerarea procesului de eliminare a activităților de extracție a sării.                                | <input type="radio"/> | <input type="radio"/>                        | <input type="radio"/>               |
| 4. Implementarea sistemului de prevenire a inundațiilor.                                                    | <input type="radio"/> | <input type="radio"/>                        | <input type="radio"/>               |
| 5. Renovarea infrastructurii care este în situație critică.                                                 | <input type="radio"/> | <input type="radio"/>                        | <input type="radio"/>               |
| 6. De salvat vechea industrie minieră din Slatina.                                                          | <input type="radio"/> | <input type="radio"/>                        | <input type="radio"/>               |
| 7. Dezvoltarea unui sistem de apă proaspătă și potabilă în zona lacurilor sărate .                          | <input type="radio"/> | <input type="radio"/>                        | <input type="radio"/>               |
| 8. Dezvoltarea sistemului de urmărire a liniilor de sedimente în zona lacurilor sărate .                    | <input type="radio"/> | <input type="radio"/>                        | <input type="radio"/>               |
| 9. Îmbunătățirea sistemului de canalizare.                                                                  | <input type="radio"/> | <input type="radio"/>                        | <input type="radio"/>               |
| 10. De-a umple (astupa ) surpările.                                                                         | <input type="radio"/> | <input type="radio"/>                        | <input type="radio"/>               |
| 11. De curățat lacurile sărate.                                                                             | <input type="radio"/> | <input type="radio"/>                        | <input type="radio"/>               |
| 12. Conservarea tunelelor de sare și puțurilor .                                                            | <input type="radio"/> | <input type="radio"/>                        | <input type="radio"/>               |
| 13. De-a implementa legi mai stricte legate de construcție. Crearea și implementarea Codului de Construcții | <input type="radio"/> | <input type="radio"/>                        | <input type="radio"/>               |
| 14. Instalarea gardului în zonele avariate( zona de excludere.                                              | <input type="radio"/> | <input type="radio"/>                        | <input type="radio"/>               |

|                                                                                                                                                                                                             | 100% implementare     | Implementare parțială La anumite niveluri | Nu intererez și nu schimb situația |
|-------------------------------------------------------------------------------------------------------------------------------------------------------------------------------------------------------------|-----------------------|-------------------------------------------|------------------------------------|
| 15.Reclamarea (reînnoirea) zonelor avariate.                                                                                                                                                                | <input type="radio"/> | <input type="radio"/>                     | <input type="radio"/>              |
| 16. Визначити найближчі зони переселення для людей із аварійних зон, в межах або біля Солотвина De decis cele mai apropiate zone de strămutare pentru locuitori din zonele avariate în sau lângă localitate | <input type="radio"/> | <input type="radio"/>                     | <input type="radio"/>              |
| 17. De strămutat locuitorii districtului a celor care locuiesc în blocurile cu cinci etaje a caselor 1,2,3, De pe str. Evropeisca                                                                           | <input type="radio"/> | <input type="radio"/>                     | <input type="radio"/>              |
| 18. De-a strămuta locuitorii altor zone de risc înalt din Slatina în cazul apariția situației de urgență.                                                                                                   | <input type="radio"/> | <input type="radio"/>                     | <input type="radio"/>              |
| 19. Eliminarea echipamentelor utilizate în activitățile miniere și de extragere a sării .                                                                                                                   | <input type="radio"/> | <input type="radio"/>                     | <input type="radio"/>              |
| 20 . Demontarea echipamentele miniere vechi și periculoase lăsate la suprafață..                                                                                                                            | <input type="radio"/> | <input type="radio"/>                     | <input type="radio"/>              |
| 21. De demolat clădirile în stare de urgență și pericol .                                                                                                                                                   | <input type="radio"/> | <input type="radio"/>                     | <input type="radio"/>              |
| 22. De demolat elementele de infrastructură ce sunt în stare de urgență și pericol.                                                                                                                         | <input type="radio"/> | <input type="radio"/>                     | <input type="radio"/>              |

Q6.7.

În opinia dumneavoastră, ce trebuie de făcut pentru a rezolva problema alunecărilor de teren? Pentru fiecare dintre următoarele opțiuni, selectați una dintre cele trei declarații

|                                                                                                                          | 100% de oprit         | Parțial stopată       | Nu trebuie schimba situația |
|--------------------------------------------------------------------------------------------------------------------------|-----------------------|-----------------------|-----------------------------|
| 1. Eliminați consecințele și oportunitățile pentru inundații noi, subterane .                                            | <input type="radio"/> | <input type="radio"/> | <input type="radio"/>       |
| 2. Eliminarea problemei legată de scurgerile din conducta de apă.                                                        | <input type="radio"/> | <input type="radio"/> | <input type="radio"/>       |
| 3. Eliminarea problemei legată de scurgeri ale conductei de canalizare în interiorul și în apropierea minei №8.          | <input type="radio"/> | <input type="radio"/> | <input type="radio"/>       |
| 4. De oprit emiterea permiselor de dobândire a sării.                                                                    | <input type="radio"/> | <input type="radio"/> | <input type="radio"/>       |
| 5. de oprit emiterea permiselor la deschiderea stațiunilor de recreere                                                   | <input type="radio"/> | <input type="radio"/> | <input type="radio"/>       |
| 6. De oprit orice alte planuri legate de extracția sării din mine                                                        | <input type="radio"/> | <input type="radio"/> | <input type="radio"/>       |
| 7. De oprit toate planurile pe viitor de dizolvare a sării în mine, în minele de sare deschise .                         | <input type="radio"/> | <input type="radio"/> | <input type="radio"/>       |
| 8. De oprit exploatarea minelor din Slatina și a tuturor teritoriilor din jurul lor.                                     | <input type="radio"/> | <input type="radio"/> | <input type="radio"/>       |
| 9. De oprit exploatarea zonelor de recreere a lacurile sărate.                                                           | <input type="radio"/> | <input type="radio"/> | <input type="radio"/>       |
| 10. De oprit pomparea apei sărtae din minele abandonate și din bazinele de sare.                                         | <input type="radio"/> | <input type="radio"/> | <input type="radio"/>       |
| 11. De oprit folosința resurselor de sare ( apa sărată și sarea stâncoasă) pentru tratamente de sănătate (speleoterapia) | <input type="radio"/> | <input type="radio"/> | <input type="radio"/>       |
| 12. De oprit construcțiile ulterioare în zona lacurilor sărate.                                                          | <input type="radio"/> | <input type="radio"/> | <input type="radio"/>       |
| 13. De oprit poluarea lacurilor sărate.                                                                                  | <input type="radio"/> | <input type="radio"/> | <input type="radio"/>       |
| 14. De oprit emisiile de resturi de rocă în Tisa.                                                                        | <input type="radio"/> | <input type="radio"/> | <input type="radio"/>       |
| 15. De oprit săparea unor puțuri noi.                                                                                    | <input type="radio"/> | <input type="radio"/> | <input type="radio"/>       |
| 16. De oprit eliminarea necontrolată a deșeurilor (gunoiului) în apropierea surpărilor și stâncilor carstice.            | <input type="radio"/> | <input type="radio"/> | <input type="radio"/>       |

### Final Reflection

Q7.1.

În opinia dumneavoastră, resursele funciare din Slatina pot fi restaurate / reabilitate?

- ☐ Da
- ☐ Nu
- ☐ Posibil, dați explicație vă rugăm

Q7.2.

Vă mulțumim că ați participat la acest sondaj.

Apreciam și vă mulțumim sincer pentru informațiile pe care le-ați furnizat pe parcursul acestui sondaj. Răspunsurile dvs. ne vor ajuta să identificăm cele mai eficiente și avantajoase moduri de a ajuta la rezolvarea problemelor dificile din loc. Slatina. Așteptați raportul creat din acest sondaj pe site-ul nostru de la [www.improdiert.eu](http://www.improdiert.eu). Raportul va fi disponibil pe tot parcursul anului 2020. Dacă aveți comentarii sau sugestii cu privire la sondajul nostru, vă rugăm să le scrieți mai jos
