# Supplementary material
Source: MDPI journal article supplement (https://www.mdpi.com/2071-1050/12/13/5461)
Supplement: s1 [file s1]

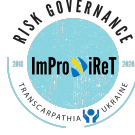

## ImProDiReT Risk Evaluation Approach for Solotvyno Municipality

Українська ▾

### Informed Consent Form

#### Q1.1. Назва школи:

- румунська загальноосвітня школа
- українська загальноосвітня школа
- угорська загальноосвітня школа імені ЯношаБойої
- румунський ліцей

#### Q1.2. Ім'я учня/ вчителя

#### Q1.3. Тип учасника:

- вчитель
- сусід 1
- родина учня
- сусід2

#### Q1.4.

**Перед згодою брати участь в опитуванні, важливо прочитати наступне пояснення. Після того, як Ви прочитали пояснення до опитування, будь ласка, дайте відповіді на наступні запитання позначкою "Так" або "Ні" .**

**Назва та деталі дослідження:** Оцінювання селищі Солотвино. Це ризику катастрофи в вивчення є частиною більшого проекту Європейського Союзу "Покращення зменшення ризику природних катастроф у Закарпатській області, Україна - Improdiret (Головний дослідник (надалі "ГД") : проф. BartelVandeWalle, EU DG ECHO проект 783232 в управлінні ризику).

**Дослідники:** Dr. AbbyMurichoOnencan (надалі "Дослідник"), Департаментмульти-акторних систем, секція аналізу політики, факультет технології, політики та управління, Делфт Технологічний університет, Нідерланди.

**Мета дослідження :** мета опитування - оцінити, що ми можемо зробити для безпеки громади у Солотвині. Дані забезпечать вклад до плану дій громади для скорочення ризику проваль землі біля соляних шахт

**Конфіденційність та управління даними:** Ми зберемо відомості про оцінку рівня ризику, підготовленість до природної катастрофи і визначимо території, які відносяться до небезпечних . Крім того, гео- дані будуть зібрані, щоб нанести на карту для сприйняття рівня ризику катастрофи. Обробка і зберігання Ваших даних керуватиметься відповідно до Положення 2016/679 Євросоюзу «Про загальне регулювання захисту даних». Ви маєте право запросити доступ до даних, змінити або стерти Ваші особисті дані у будь-який час. Будь-які особисті дані, як, наприклад, імена, ідентичність, місцезнаходження, будуть змінені або стерті, щоб гарантувати анонімність. Анонімні дані можуть бути використані для дослідження і публікацій на період тривалості проекту. Протягом тривалості проекту (1 вересня 2019р. - 29 лютого 2020р.), особиста інформація буде доступна тільки членам проекту (Дослідник ПІ). Дані будуть збережені в Нідерландах і ніколи не стануть доступними третій стороні. Після проекту анонімні дані і дослідницькі результати (не персональні) будуть збережені в архіві впродовж 10 років і будуть доступними будь-кому.

**Пояснення :** Ви будете запрошені відповісти на запитання про Ваше відношення до ризику проваль у Солотвині, Ваш рівень підготовленості і що Вас пов'язує з цією територією. Тривалість анкетування 15-30 хвилин.

**Ризик:** головний ризик участі у вивченні пов'язаний з використанням Ваших особистих даних впродовж обробки і зберігання інформації іншою особою, до повного завершення вивчення. Дослідник мінімізував ризики, використовуючи тільки анонімні дані, які не можуть бути пов'язані з вами . Отже, ризики перехоплення даних мінімальні. Іншими словами, участь в опитуванні - безпечна для учасників. Участь в цьому опитуванні не зашкодить Вашому здоров'ю.

**Питання:** Будь-які питання з приводу дослідження і опитування та/або у випадку виникнення проблем через дослідження можуть бути направлені дослідникові, Abby M. Onencan, TU DelftFacultyofTPM, Jaffalaan 5, 2628 BXdelft, Email: A.M.Onencan@tudelft.nl.

Так Ні

|                                                                                                                                                                                                                                                                                                                                                                                                                                                                                                       | Так                   | Ні                    |
|-------------------------------------------------------------------------------------------------------------------------------------------------------------------------------------------------------------------------------------------------------------------------------------------------------------------------------------------------------------------------------------------------------------------------------------------------------------------------------------------------------|-----------------------|-----------------------|
| 1. Я ознайомився із вищенаведеною інформацією або вона була прочитана мені. Я мав можливість задати питання, пов'язані з попередньою консультативною інформацією та, на будь-яке із заданих мною питань, я отримав належну відповідь .                                                                                                                                                                                                                                                                | <input type="radio"/> | <input type="radio"/> |
| 2. Я надаю добровільну згоду на проходження даного опитування. Я повністю розумію, що, в будь-який момент, можу відмовитись відповісти на нижченаведені питання та відмовитись від подальшого проходження даного курсу без надання будь-якого пояснення або причин.                                                                                                                                                                                                                                   | <input type="radio"/> | <input type="radio"/> |
| 3.Я повністю усвідомлюю можливість виникнення ризиків, пов'язаних зі збереженням та обробкою моїх персональних даних, наданих під час проходження даного опитування. Крім того, я розумію, що дослідники, які проводять це опитування повинні мінімізувати шанси на виникнення будь-яких ризиків, пов'язаних із персональними даними, шляхом прийняття належних та надійних заходів по обробці, збереженню та надання доступу до вразливої інформації, як під час, так і після проведення дослідження | <input type="radio"/> | <input type="radio"/> |
| 4. Я розумію, що, надана мною, анонімна інформація (анонімні опитування, стенограми) буде використовуватися для подальшої публікації у науково-дослідницьких, та пов'язаних із даним видом діяльності, наукових працях і публікаціях (веб-сайтах, звітах, блогах і т.д.)                                                                                                                                                                                                                              | <input type="radio"/> | <input type="radio"/> |
| 5. Я повністю усвідомлюю те, що особиста інформація про мене (місце проживання та інші дані, які можуть бути використані для ідентифікації моєї особистості) не будуть розповсюджені серед дослідників та в інших зразках.                                                                                                                                                                                                                                                                            | <input type="radio"/> | <input type="radio"/> |

### Q1.5. Підпис

**SIGN  
HERE**

[clear](#)

### Demographics

#### Q2.1. Вік

- |                             |                             |
|-----------------------------|-----------------------------|
| <input type="radio"/> До 18 | <input type="radio"/> 55-64 |
| <input type="radio"/> 18-24 | <input type="radio"/> 65-74 |
| <input type="radio"/> 25-34 | <input type="radio"/> 75-84 |
| <input type="radio"/> 35-44 | <input type="radio"/> Інше  |
| <input type="radio"/> 45-54 |                             |

#### Q2.2. Стать

- Чол.
- Жін.

#### Q2.3. Освіта

- |                                         |                                        |
|-----------------------------------------|----------------------------------------|
| <input type="radio"/> немає             | <input type="radio"/> бакалавр         |
| <input type="radio"/> початкова         | <input type="radio"/> магістр          |
| <input type="radio"/> середня           | <input type="radio"/> постдокторантура |
| <input type="radio"/> середньо-технічна |                                        |

#### Q2.4. Сімейний стан

- |                                      |                                      |
|--------------------------------------|--------------------------------------|
| <input type="radio"/> неодружений/-а | <input type="radio"/> розлучений/-а  |
| <input type="radio"/> одружений/-а   | <input type="radio"/> вдовець/-вдова |

#### Q2.5. Віросповідання

- не впевнений
- атеїст
- православний
- римо-католик
- протестант
- іудей

- буддист
- язичник
- греко-католик
- свідок Іегови
- нерелігійний
- Інше, вкажіть

q2.6. Етнічне походження

- Українець
- Русин
- Угорець
- Румун
- Циган

- Росіянин
- Словак
- Чех
- Німець
- Інше, вкажіть

q2.7. Річний дохід

- Низький (нижче \$1.90 на день)
- Середній

- Високий

q2.8. Домашня адреса (Назва вулиці)

q2.9. Нижче наведена зонувана карта, будь ласка, позначте на якій території ви живете, працюєте, ваші діти ходять до школи, ви ходите до церкви, маєте бізнес або орендуєте житло.

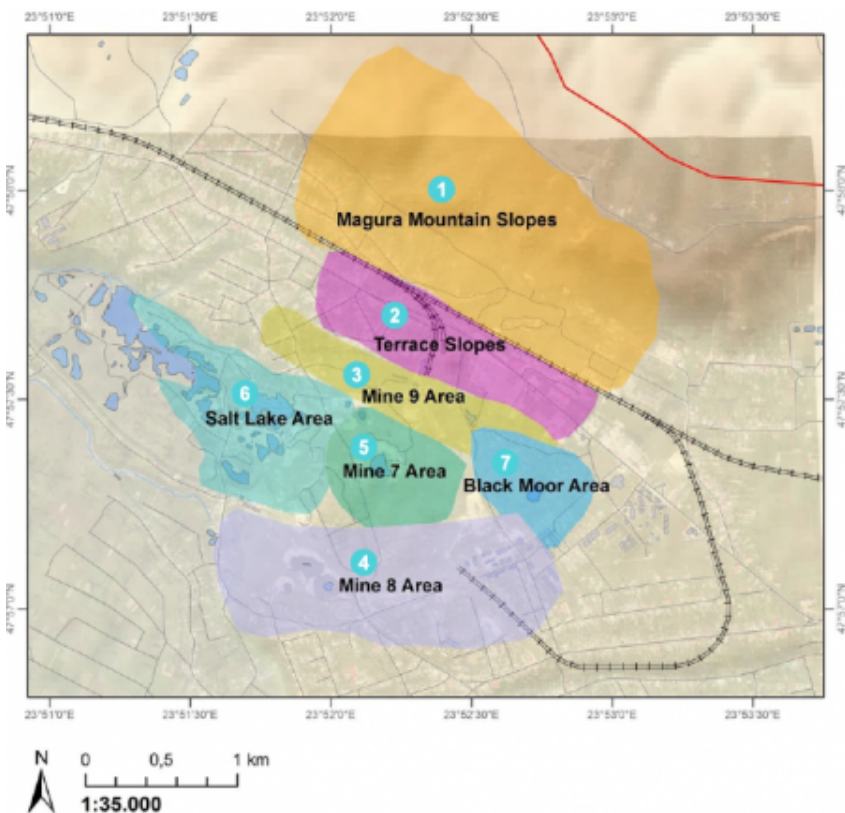

|                                                       | Живете                | Працюєте              | Діти ходять до школи  | Відвідуєте церкву     | Маєте бізнес          | Регулярно відвідуєте цю територію | Орендуєте квартиру/ будинок |
|-------------------------------------------------------|-----------------------|-----------------------|-----------------------|-----------------------|-----------------------|-----------------------------------|-----------------------------|
| 1. Територія навколо Магури                           | <input type="radio"/>             | <input type="radio"/>       |
| 2. Територія та будинки вздовж траси (вул. Спортивна) | <input type="radio"/>             | <input type="radio"/>       |
| 3. Територія навколо шахти №9                         | <input type="radio"/>             | <input type="radio"/>       |
| 4. Територія навколо шахти №8                         | <input type="radio"/>             | <input type="radio"/>       |
| 5. Територія навколо шахти №7                         | <input type="radio"/>             | <input type="radio"/>       |
| 6. Територія Солених Озер                             | <input type="radio"/>             | <input type="radio"/>       |
| 7. П'ятиповерхові будинки 1,2,3 по вул.Європейська    | <input type="radio"/>             | <input type="radio"/>       |
| 8. Інше, вкажіть<br><input type="text"/>              | <input type="radio"/>             | <input type="radio"/>       |
| 9. Інше, вкажіть<br><input type="text"/>              | <input type="radio"/>             | <input type="radio"/>       |
| 10. Інше, вкажіть<br><input type="text"/>             | <input type="radio"/>             | <input type="radio"/>       |

### Household

Q3.1. Скільки років проживаєте у Солотвино ?

Q3.2. Тип житла

- Власне
- Орендоване
- Іпотека
- Інше, вкажіть

Q3.3. Скільки людей у Вашій родині?

Q3.4. Тип родини

- Повна
- Багатодітна
- Виховує один з батьків
- Бездітна
- Інше, вкажіть

Q3.5. Стан проживання

- Живете самі
- Живете з партнером
- Повна родина
- Проживає декілька родин у будинку
- Родина проживає разом з пристарілими батьками
- Інше, вкажіть

### q3.6. Чи має хтось з Вашої родини фізичні вади?

- Так
- Ні

#### Place Attachment Scale

q4.1. Будь ласка, позначте наскільки Ви згодні або не згодні з даними твердженнями Солотвину важливе для мене тому, що:

|                                                                                                                            | Зовсім не згоден      | Не згоден             | Байдуже               | Згоден                | Повністю згоден       |
|----------------------------------------------------------------------------------------------------------------------------|-----------------------|-----------------------|-----------------------|-----------------------|-----------------------|
| 1. Будучи прикордонним містом, у Солотвині є багато можливостей                                                            | <input type="radio"/> |
| 2. У цьому місці я маю друзів, які можуть надати мені фінансову допомогу.                                                  | <input type="radio"/> |
| 3. Тут я можу легко взяти позику.                                                                                          | <input type="radio"/> |
| 4. Я не думаю про інші місця, так як тут дуже родюча земля.                                                                | <input type="radio"/> |
| 5. Це місце дає мені більше життєві можливості, ніж будь-яке інше місце в Україні.                                         | <input type="radio"/> |
| 6. Тут добре розвивається туризм                                                                                           | <input type="radio"/> |
| 7. Якість солі у Солотвині краща, ніж в інших місцях України.                                                              | <input type="radio"/> |
| 8. Тут я маю збудований будинок                                                                                            | <input type="radio"/> |
| 9. Мої предки та батьки жили тут і поховані тут.                                                                           | <input type="radio"/> |
| 10. Тут люди знають мене                                                                                                   | <input type="radio"/> |
| 11. Мої предки були відомими особами у Солотвині                                                                           | <input type="radio"/> |
| 12. Я знаходжу тут пам'ять про своїх предків та батьків.                                                                   | <input type="radio"/> |
| 13. Мої члени родини можуть працювати у Чехії, Росії, Угорщині та в інших містах України, залишаючись мешканцями Солотвина | <input type="radio"/> |
| 14. Завдяки моєму етнічному походженню, я почувуюся краще тут, ніж в інших місцях України.                                 | <input type="radio"/> |
| 15. Я не можу почуватися задоволеним, не відвідавши церкви раз на тиждень.                                                 | <input type="radio"/> |
| 16. Колективні фестивалі, які тут організуються, дуже важливі для мене.                                                    | <input type="radio"/> |
| 17. Мені подобається різноманіття мов, шкіл та церков.                                                                     | <input type="radio"/> |
| 18. Живучи на землі своїх предків, я можу отримати будь-яку підтримку.                                                     | <input type="radio"/> |

#### Land Subsidence Preparedness Scale

q5.1. Чи маєте ви наступне наготові у разі зсуву землі? Будь ласка, позначте кожний пункт «так», «невпевнений», «ні».

|                                                                                                                                                  | Так                   | Невпевнений           | Ні                    |
|--------------------------------------------------------------------------------------------------------------------------------------------------|-----------------------|-----------------------|-----------------------|
| 1. Важливі документи, які зберігаються у сумці або в сейфі.                                                                                      | <input type="radio"/> | <input type="radio"/> | <input type="radio"/> |
| 2. Домашні приналежності, які зберігаються у переносних сейфах або сейфах.                                                                       | <input type="radio"/> | <input type="radio"/> | <input type="radio"/> |
| 3. Справне радіо, яке знаходиться у належному стані.                                                                                             | <input type="radio"/> | <input type="radio"/> | <input type="radio"/> |
| 4. Факели/карманні ліхтарики (з достатнім рівнем заряду, кількістю батарейок, свічки, переносні генератори, повністю укомплектовані для роботи). | <input type="radio"/> | <input type="radio"/> | <input type="radio"/> |
| 5. Комплект аварійного приладдя, укомплектований для зручного перенесення у рюкзаку.                                                             | <input type="radio"/> | <input type="radio"/> | <input type="radio"/> |
| 6. Чиста питна вода                                                                                                                              | <input type="radio"/> | <input type="radio"/> | <input type="radio"/> |
| 7. Переносна аптечка.                                                                                                                            | <input type="radio"/> | <input type="radio"/> | <input type="radio"/> |
| 8. Необхідний запас коштів, призначений для використання у надзвичайних ситуаціях, таких як термінова та неочікувана евакуація.                  | <input type="radio"/> | <input type="radio"/> | <input type="radio"/> |
| 9. Страховий поліс (на майно, здоров'я, життя також розрахований на шкоду спричинену зсувами землі або їх наслідками).                           | <input type="radio"/> | <input type="radio"/> | <input type="radio"/> |
| 10. Надзвичайний евакуаційний план-домовленість з одним із родичів, який не проживає в Солотвині                                                 | <input type="radio"/> | <input type="radio"/> | <input type="radio"/> |

q5.2. Будь-ласка, позначте рівень складності у підготовці ваших особистих речей та родини до неочікуваних ситуацій? Варіанти відповіді варіюються від «взагалі не складно» до «надзвичайно складно».

|                                                                                                                                                  | Зовсім не важко       | Трохи важко           | В деякій мірі важко   | Дуже важко            | Надзвичайно важко     |
|--------------------------------------------------------------------------------------------------------------------------------------------------|-----------------------|-----------------------|-----------------------|-----------------------|-----------------------|
| 1. Важливі документи, які зберігаються у сумці або в сейфі.                                                                                      | <input type="radio"/> |
| 2. Домашні приналежності, які зберігаються у переносних сейфах або сейфах.                                                                       | <input type="radio"/> |
| 3. Справне радіо, яке знаходиться у належному стані.                                                                                             | <input type="radio"/> |
| 4. Факели/карманні ліхтарики (з достатнім рівнем заряду, кількістю батарейок, свічки, переносні генератори, повністю укомплектовані для роботи). | <input type="radio"/> |
| 5. Комплект аварійного приладдя, укомплектований для зручного перенесення у рюкзаку.                                                             | <input type="radio"/> |
| 6. Чиста питна вода                                                                                                                              | <input type="radio"/> |
| 7. Переносна аптечка.                                                                                                                            | <input type="radio"/> |
| 8. Необхідний запас коштів, призначений для використання у надзвичайних ситуаціях, таких як термінова та неочікувана евакуація.                  | <input type="radio"/> |
| 9. Страховий поліс (на майно, здоров'я, життя також розрахований на шкоду спричинену зсувами землі або їх наслідками).                           | <input type="radio"/> |
| 10. Надзвичайний евакуаційний план-домовленість з одним із родичів, який не проживає в Солотвині                                                 | <input type="radio"/> |

**Q5.3.** Будь-ласка, вкажіть ступінь підготовленості Вашої родини до виникнення непередбачуваних ризиків або загроз, таких як стихійні лиха. Поставте позначку, що збігається із Вашим варіантом відповіді

|                                                                                                                                                                                                        | Так                   | Невпевнений           | Ні                    |
|--------------------------------------------------------------------------------------------------------------------------------------------------------------------------------------------------------|-----------------------|-----------------------|-----------------------|
| 1 Чи знаєте Ви до якої державної установи звертатися у випадку виникнення зсувів землі?                                                                                                                | <input type="radio"/> | <input type="radio"/> | <input type="radio"/> |
| 2. Чи знаєте Ви які попереджувальні знаки або сигнали тривоги використовуються у Солотвині?                                                                                                            | <input type="radio"/> | <input type="radio"/> | <input type="radio"/> |
| 3. Чи приймаєте Ви участь у суспільних обговореннях щодо питань, пов'язаних із запобіганням зсувів землі?                                                                                              | <input type="radio"/> | <input type="radio"/> | <input type="radio"/> |
| 4. Чи відвідуєте Ви зустрічі, пов'язані із питаннями підготовки до можливого виникнення зсувів землі, скликані школами, державними урядовими організаціями, органами місцевого самоврядування, урядом? | <input type="radio"/> | <input type="radio"/> | <input type="radio"/> |
| 5. Чи ознайомились Ви та члени Вашої родини з планом дій у разі виникнення надзвичайних ситуацій під час знаходження вдома, на роботі, в школі, в дитячому садочку або в будинку престарілих?          | <input type="radio"/> | <input type="radio"/> | <input type="radio"/> |
| 6. Чи підготували Ви майно до зменшення шкоди від зсувів землі або їх наслідків                                                                                                                        | <input type="radio"/> | <input type="radio"/> | <input type="radio"/> |
| 7. Ви або хтось із членів Вашої родини ознайомлений із методами та способами надання першої допомоги?                                                                                                  | <input type="radio"/> | <input type="radio"/> | <input type="radio"/> |
| 8. Чи знаєте Ви, як облаштувати тимчасове укриття?                                                                                                                                                     | <input type="radio"/> | <input type="radio"/> | <input type="radio"/> |

**Q5.4.** Будь-ласка, оцініть ступінь складності підготовки вашої родини до кожного з нижченаведених питань. Варіанти відповіді варіюються від «не складно» до «надзвичайно складно».

|                                                                                                                                                                                                           | Зовсім не важко       | Трохи важко           | В деякій мірі важко   | Дуже важко            | Надзвичайно важко     |
|-----------------------------------------------------------------------------------------------------------------------------------------------------------------------------------------------------------|-----------------------|-----------------------|-----------------------|-----------------------|-----------------------|
| 1. Чи знаєте Ви до яких організацій звертатись (місцевих, регіональних, центральних) у випадках, коли Ви особисто зіткнетесь із зсувом землі?                                                             | <input type="radio"/> |
| 2. Чи знаєте Ви які попереджувальні знаки або сигнали тривоги використовуються у Солотвині?                                                                                                               | <input type="radio"/> |
| 3. Чи приймаєте Ви участь у суспільних обговореннях щодо питань, пов'язаних із запобіганням зсувів землі?                                                                                                 | <input type="radio"/> |
| 4. Чи відвідуєте Ви зібрання, пов'язані із питаннями по підготовці до можливого виникнення зсувів землі, скликані школами, державними урядовими організаціями, органами місцевого самоврядування, урядом? | <input type="radio"/> |
| 5. Чи ознайомились Ви та члени вашої родини з планом дій, у разі виникнення надзвичайних ситуацій під час знаходження вдома, на роботі, в школі, в дитячому садочку або в будинку престарілих?            | <input type="radio"/> |
| 6. Чи підготували Ви Ваше майно до зменшення шкоди від зсувів землі або їх наслідків?                                                                                                                     | <input type="radio"/> |
| 7. Ви або хтось із членів вашої родини ознайомлений із методами та способами надання першої допомоги?                                                                                                     | <input type="radio"/> |
| 8 Чи знаєте Ви, як облаштувати тимчасове укриття?                                                                                                                                                         | <input type="radio"/> |

#### Solotvyno Community-based Risk Evaluation

**Q6.1.** На Вашу думку, як би Ви позначили рівень загрози для людей, які проживають або займаються підприємницькою діяльністю в наступних частинах Солотвина? (наведені на карті в питанні 2.8.)

|                                                       | Катастрофічний (термінове переселення) | критичний (проживання в такій місцевості являється дуже небезпечним та не рекомендованим) | підвищений (місцевість потребує заходів по зниженню виникнення можливих ризиків) | мінімальний (небезпечно тільки в певних частинах місцевості, які можна обійти або полагодити) | незначний (в загальному безпечно) |
|-------------------------------------------------------|----------------------------------------|-------------------------------------------------------------------------------------------|----------------------------------------------------------------------------------|-----------------------------------------------------------------------------------------------|-----------------------------------|
| 1. Територія навколо Магури                           | <input type="radio"/>                  | <input type="radio"/>                                                                     | <input type="radio"/>                                                            | <input type="radio"/>                                                                         | <input type="radio"/>             |
| 2. Територія та будинки вздовж траси (вул. Спортивна) | <input type="radio"/>                  | <input type="radio"/>                                                                     | <input type="radio"/>                                                            | <input type="radio"/>                                                                         | <input type="radio"/>             |
| 3. Територія навколо шахти №9                         | <input type="radio"/>                  | <input type="radio"/>                                                                     | <input type="radio"/>                                                            | <input type="radio"/>                                                                         | <input type="radio"/>             |
| 4. Територія навколо шахти №8                         | <input type="radio"/>                  | <input type="radio"/>                                                                     | <input type="radio"/>                                                            | <input type="radio"/>                                                                         | <input type="radio"/>             |
| 5. Територія навколо шахти №7                         | <input type="radio"/>                  | <input type="radio"/>                                                                     | <input type="radio"/>                                                            | <input type="radio"/>                                                                         | <input type="radio"/>             |
| 6. Територія Солених Озер                             | <input type="radio"/>                  | <input type="radio"/>                                                                     | <input type="radio"/>                                                            | <input type="radio"/>                                                                         | <input type="radio"/>             |
| 7. П'ятиповерхові будинки 1,2,3 по вул.Європейська    | <input type="radio"/>                  | <input type="radio"/>                                                                     | <input type="radio"/>                                                            | <input type="radio"/>                                                                         | <input type="radio"/>             |

Q6.2. На Вашу думку, що імовірніше всього може статися, якщо зсуви землі і надалі виникатимуть, а їх наслідки залишатимуться без подальшої уваги?

|                                                                                          | Висока імовірність    | Імовірно              | Не дуже імовірно      | Не імовірно           | Надзвичайно не імовірно |
|------------------------------------------------------------------------------------------|-----------------------|-----------------------|-----------------------|-----------------------|-------------------------|
| 1. Втрата життя/життів                                                                   | <input type="radio"/>   |
| 2. Важкі втрати (серед місцевого населення або туристів)                                 | <input type="radio"/>   |
| 3. Економічні втрати (пошкоджені/зруйновані будівлі та інфраструктура)                   | <input type="radio"/>   |
| 4. Відсутність питної води (знищення джерел прісної води)                                | <input type="radio"/>   |
| 5. Закриття шкіл (української, румунської, угорської та ін.)                             | <input type="radio"/>   |
| 6. Заселення земель, які використовуються для сільськогосподарської діяльності           | <input type="radio"/>   |
| 7. Заселення річок Тиси та Дунаю (низових течій)                                         | <input type="radio"/>   |
| 8. Втрата робочих місць                                                                  | <input type="radio"/>   |
| 9. Виникнення безпритульності                                                            | <input type="radio"/>   |
| 10. Закриття транспортної інфраструктури (знищення залізничних шляхів та головних доріг) | <input type="radio"/>   |
| 11. Знищення газопроводу)                                                                | <input type="radio"/>   |
| 12. Занепад Солотвинського та Рахівського регіонів (знищення електростанцій)             | <input type="radio"/>   |

Q6.3. Уявімо, що Вам було передано право власності на будинок в будь-якій із нижче наведених зон. Спираючись на Ваші знання та розуміння ситуації, що склалася у Солотвині, що Ви оберете? Для кожного із варіантів виберіть одне із трьох тверджень: твердження «А»: прийняти право власності на будинок та терміново переїхати на нове місце проживання; твердження «В»: прийняти право власності лише після того, як Ви особисто переконаєтесь, що на новому місці проживання безпечно; твердження «С»: відмовитись від переїзду.

|                                                       | прийняти право власності на будинок та терміново переїхати на нове місце | Прийняти право власності лише після того, як Ви особисто переконаєтесь, що на новому місці проживання безпечно | Відмовитись від переїзду |
|-------------------------------------------------------|--------------------------------------------------------------------------|----------------------------------------------------------------------------------------------------------------|--------------------------|
| 1. Територія навколо Магури                           | <input type="radio"/>                                                    | <input type="radio"/>                                                                                          | <input type="radio"/>    |
| 2. Територія та будинки вздовж траси (вул. Спортивна) | <input type="radio"/>                                                    | <input type="radio"/>                                                                                          | <input type="radio"/>    |
| 3. Територія навколо шахти №9                         | <input type="radio"/>                                                    | <input type="radio"/>                                                                                          | <input type="radio"/>    |
| 4. Територія навколо шахти №8                         | <input type="radio"/>                                                    | <input type="radio"/>                                                                                          | <input type="radio"/>    |
| 5. Територія навколо шахти №7                         | <input type="radio"/>                                                    | <input type="radio"/>                                                                                          | <input type="radio"/>    |
| 6. Територія Солених Озер                             | <input type="radio"/>                                                    | <input type="radio"/>                                                                                          | <input type="radio"/>    |
| 7. П'ятиповерхові будинки 1,2,3 по вул.Європейська    | <input type="radio"/>                                                    | <input type="radio"/>                                                                                          | <input type="radio"/>    |

Q6.4. Уявімо, що Вам було видано дозвіл на будівництво власної туристичної бази в будь-якій із нижче наведених зон. Спираючись на Ваші знання та розуміння ситуації, що склалася у Солотвині, що Ви оберете? Для кожного із варіантів виберіть одне із трьох тверджень: твердження «А»: прийняти дозвіл та терміново почати будівництво власного підприємства; твердження «В»: прийняти дозвіл лише після того, як Ви особисто впевнитесь в тому, що дана зона є цілком безпечною для будівництва та ведення бізнесу; твердження «С»: відмовитись від наданого Вам дозволу та будівництва.

|                                                       | Прийняти дозвіл та терміново почати будівництво | Прийняти дозвіл лише після того, як Ви особисто впевнитесь у безпеці | Відмовитись від бізнесу на цій території |
|-------------------------------------------------------|-------------------------------------------------|----------------------------------------------------------------------|------------------------------------------|
| 1. Територія навколо Магури                           | <input type="radio"/>                           | <input type="radio"/>                                                | <input type="radio"/>                    |
| 2. Територія та будинки вздовж траси (вул. Спортивна) | <input type="radio"/>                           | <input type="radio"/>                                                | <input type="radio"/>                    |
| 3. Територія навколо шахти №9                         | <input type="radio"/>                           | <input type="radio"/>                                                | <input type="radio"/>                    |
| 4. Територія навколо шахти №8                         | <input type="radio"/>                           | <input type="radio"/>                                                | <input type="radio"/>                    |
| 5. Територія навколо шахти №7                         | <input type="radio"/>                           | <input type="radio"/>                                                | <input type="radio"/>                    |
| 6. Територія Солених Озер                             | <input type="radio"/>                           | <input type="radio"/>                                                | <input type="radio"/>                    |
| 7. П'ятиповерхові будинки 1,2,3 по вул.Європейська    | <input type="radio"/>                           | <input type="radio"/>                                                | <input type="radio"/>                    |

q6.5. Уявімо, що Вам було видано дозвіл на будівництво соляної шахти та лікарні з спелеотерапією влюбій із нижче наведених зон. Спираючись на Ваші знання та розуміння ситуації, що склалася у Солотвині, що Ви оберете? Для кожного із варіантів виберіть одне із трьох тверджень – твердження «А»: прийняти дозвіл, відкрити шахту та терміново почати будівництво лікарні; твердження «В»: прийняти дозвіл лише після того, як Ви особисто впевнитесь в тому, що дана зона є цілком безпечною для будівництва; твердження «С»: відмовитись від наданого Вам дозволу та будівництва.

|                                                       | Прийняти дозвіл, відкрити шахту та терміново почати будівництво лікарні | Прийняти дозвіл лише після того, як Ви особисто впевнитесь в тому, що дана зона є цілком безпечною для будівництва | Відмовитись від бізнесу на цій території |
|-------------------------------------------------------|-------------------------------------------------------------------------|--------------------------------------------------------------------------------------------------------------------|------------------------------------------|
| 1. Територія навколо Магури                           | <input type="radio"/>                                                   | <input type="radio"/>                                                                                              | <input type="radio"/>                    |
| 2. Територія та будинки вздовж траси (вул. Спортивна) | <input type="radio"/>                                                   | <input type="radio"/>                                                                                              | <input type="radio"/>                    |
| 3. Територія навколо шахти №9                         | <input type="radio"/>                                                   | <input type="radio"/>                                                                                              | <input type="radio"/>                    |
| 4. Територія навколо шахти №8                         | <input type="radio"/>                                                   | <input type="radio"/>                                                                                              | <input type="radio"/>                    |
| 5. Територія навколо шахти №7                         | <input type="radio"/>                                                   | <input type="radio"/>                                                                                              | <input type="radio"/>                    |
| 6. Територія Солених Озер                             | <input type="radio"/>                                                   | <input type="radio"/>                                                                                              | <input type="radio"/>                    |
| 7. П'ятиповерхові будинки 1,2,3 по вул.Європейська    | <input type="radio"/>                                                   | <input type="radio"/>                                                                                              | <input type="radio"/>                    |

q6.6. На Вашу думку, що слід зробити, щоб вирішити проблему із виникненням зсувів землі? Для кожного із нижче наведених варіантів виберіть одне із трьох тверджень – твердження «А»: віддаю перевагу 100% реалізації; твердження «В»: віддаю перевагу частковому втіленню на деяких, допустимих, рівнях; твердження «С»: віддаю перевагу не втручатись та не робити жодних змін, відповідно до теперішньої ситуації.

|                                                                                                                   | 100% реалізація       | Часткове втілення на певних рівнях | Зовсім не змінювати ситуацію |
|-------------------------------------------------------------------------------------------------------------------|-----------------------|------------------------------------|------------------------------|
| 1. Очистити солені озера                                                                                          | <input type="radio"/> | <input type="radio"/>              | <input type="radio"/>        |
| 2. Посилити систему підпірних стінок.                                                                             | <input type="radio"/> | <input type="radio"/>              | <input type="radio"/>        |
| 3. Пришвидшити процес ліквідації заходів по видобутку солі.                                                       | <input type="radio"/> | <input type="radio"/>              | <input type="radio"/>        |
| 4. Реалізувати систему попереднього реагування на повені.                                                         | <input type="radio"/> | <input type="radio"/>              | <input type="radio"/>        |
| 5. Поновити критичні інфраструктури.                                                                              | <input type="radio"/> | <input type="radio"/>              | <input type="radio"/>        |
| 6. Зберегти стару шахтарську промисловістьСолотвина.                                                              | <input type="radio"/> | <input type="radio"/>              | <input type="radio"/>        |
| 7. Розвивати систему прісної та питної води в зоні Солених озер.                                                  | <input type="radio"/> | <input type="radio"/>              | <input type="radio"/>        |
| 8. Розвивати систему відстеження лінії осаду в зоні Солених озер.                                                 | <input type="radio"/> | <input type="radio"/>              | <input type="radio"/>        |
| 9. Покращити каналізаційну систему.                                                                               | <input type="radio"/> | <input type="radio"/>              | <input type="radio"/>        |
| 10. Заповнити провалля.                                                                                           | <input type="radio"/> | <input type="radio"/>              | <input type="radio"/>        |
| 11. Очистити солені озера.                                                                                        | <input type="radio"/> | <input type="radio"/>              | <input type="radio"/>        |
| 12. Законсервувати соляні штольні та свердловини.                                                                 | <input type="radio"/> | <input type="radio"/>              | <input type="radio"/>        |
| 13. Застосовувати більш суворі закони, пов'язані із будівництвом. Створення та застосування Будівельного Кодексу. | <input type="radio"/> | <input type="radio"/>              | <input type="radio"/>        |
| 14. Встановлення огорожі в аварійних зонах (зона відчуження).                                                     | <input type="radio"/> | <input type="radio"/>              | <input type="radio"/>        |
| 15. Меліорація (поновлення) аварійних зон.                                                                        | <input type="radio"/> | <input type="radio"/>              | <input type="radio"/>        |
| 16. Визначити найближчі зони переселення для людей із аварійних зон, в межах або біля Солотвина                   | <input type="radio"/> | <input type="radio"/>              | <input type="radio"/>        |
| 17. Переселити мешканців району, що проживають в п'ятиповерхових будинках 1,2,3 по вулиці Європейська             | <input type="radio"/> | <input type="radio"/>              | <input type="radio"/>        |



|                                                                                               | 100% реалізація       | Часткове втілення на певних рівнях | Зовсім не змінювати ситуацію |
|-----------------------------------------------------------------------------------------------|-----------------------|------------------------------------|------------------------------|
| 18. Переселити мешканців інших територій Солотвина з підвищеним рівнем виникнення загрози.    | <input type="radio"/> | <input type="radio"/>              | <input type="radio"/>        |
| 19. Усунення обладнання, яке використовувалось в гірничо-видобувній діяльності.               | <input type="radio"/> | <input type="radio"/>              | <input type="radio"/>        |
| 20. Демонтувати старе та небезпечне гірничо-видобувне обладнання, яке залишилось на поверхні. | <input type="radio"/> | <input type="radio"/>              | <input type="radio"/>        |
| 21. Знести будівлі, що знаходяться в аварійному та небезпечному стані.                        | <input type="radio"/> | <input type="radio"/>              | <input type="radio"/>        |
| 22. Знести елементи інфраструктури, що знаходяться в аварійному та небезпечному стані.        | <input type="radio"/> | <input type="radio"/>              | <input type="radio"/>        |

Q6.7.  
На Вашу думку, що слід припинити для того, щоб вирішити проблему із виникненням зсувів землі? Для кожного із нижче наведених варіантів виберіть одне із трьох тверджень

|                                                                                                                     | 100% зупинити         | Припинити частково    | Не змінювати ситуацію |
|---------------------------------------------------------------------------------------------------------------------|-----------------------|-----------------------|-----------------------|
| 1. Усунути наслідки та можливості для виникнення нових, підземних паводків.                                         | <input type="radio"/> | <input type="radio"/> | <input type="radio"/> |
| 2. Усунути проблеми, пов'язані із протіканням водопроводів.                                                         | <input type="radio"/> | <input type="radio"/> | <input type="radio"/> |
| 3. Усунути проблеми, пов'язані із протіканням каналізаційних трубопроводів в межах, та поблизу, шахти №8.           | <input type="radio"/> | <input type="radio"/> | <input type="radio"/> |
| 4. Припинити видачу дозволів на видобуток солі.                                                                     | <input type="radio"/> | <input type="radio"/> | <input type="radio"/> |
| 5. Припинити видачу дозволів на відкриття рекреаційних підприємств                                                  | <input type="radio"/> | <input type="radio"/> | <input type="radio"/> |
| 6. Призупинити всі подальші плани, пов'язані із видобутком солі з шахт.                                             | <input type="radio"/> | <input type="radio"/> | <input type="radio"/> |
| 7. Припинити всі подальші плани, пов'язані із розчиненням солі в відкритих соляних шахтах.                          | <input type="radio"/> | <input type="radio"/> | <input type="radio"/> |
| 8. Припинити експлуатацію Солотвинських шахт та всіх, прилягаючих до них, зон.                                      | <input type="radio"/> | <input type="radio"/> | <input type="radio"/> |
| 9. Припинити експлуатацію рекреаційної зони Солених озер.                                                           | <input type="radio"/> | <input type="radio"/> | <input type="radio"/> |
| 10. Припинити перекачувати солену воду із занедбаних шахт і соляні басейни.                                         | <input type="radio"/> | <input type="radio"/> | <input type="radio"/> |
| 11. Припинити використання соляних ресурсів (соленої води та кам'янистої солі) для оздоровчих цілей (спелеотерапія) | <input type="radio"/> | <input type="radio"/> | <input type="radio"/> |
| 12. Припинити подальше будівництво в зоні Солених озер.                                                             | <input type="radio"/> | <input type="radio"/> | <input type="radio"/> |
| 13. Припинити забруднення Солених озер.                                                                             | <input type="radio"/> | <input type="radio"/> | <input type="radio"/> |
| 14. Припинити викиди залишків гірських порід в Тису.                                                                | <input type="radio"/> | <input type="radio"/> | <input type="radio"/> |
| 15. Припинити риття нових свердловин.                                                                               | <input type="radio"/> | <input type="radio"/> | <input type="radio"/> |
| 16. Припинити неконтрольовану утилізацію відходів(сміття) поблизу місць карстових провалів та урвищ.                | <input type="radio"/> | <input type="radio"/> | <input type="radio"/> |

#### Final Reflection

Q7.1.  
На Вашу думку, чи можуть земельні ресурси в Солотвині бути відновленими/реабілітованими?

- Так
- Ні
- Можливо, поясніть, будь ласка

Q7.2.  
Дякуємо Вам за те, що прийняли участь в даному опитуванні.

Ми цінуємо, та щиро вдячні Вам, за інформацію, яку Ви надали під час проходження даного опитування. Ваші відповіді допоможуть нам визначити найбільш ефективні та сприятливі способи допомоги у вирішенні проблемних питань Солотвина. Чекайте на звіт, створений на основі цього опитування, на нашому сайті [www.improdiret.eu](http://www.improdiret.eu). Звіт буде доступний на протязі 2020 року. Якщо у Вас є будь-які коментарі або побажання, пов'язані із нашим опитуванням, будь-ласка, запишіть їх нижче.

Powered by Qualtrics
