# Supplementary material
Source: MDPI journal article supplement (https://www.mdpi.com/2071-1050/12/13/5461)
Supplement: s1 [file s1]

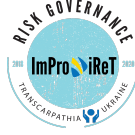

## ImProDiReT Risk Evaluation Approach for Solotvyno Municipality

Magyar ▾

### Informed Consent Form

#### Q1.1. Iskola neve

- Aknaszlatinai román nyelvű középiskola
- Aknaszlatinai ukrán nyelvű középiskola
- Aknaszlatinai Bolyai János Középiskola
- Aknaszlatinai román nyelvű liceum

#### Q1.2. A diák/tanár neve

#### Q1.3. A résztvevő típusa

- Tanár
- Diák
- Szomszéd 1
- Szomszéd 2

**Q1.4. Mielőtt beleegyezik a kutatásba, fontos, hogy olvassa el a következő magyarázatot. Miután elolvasta a felmérés magyarázatát, kérjük, válaszoljon a következő kérdésekre az „Igen” vagy „Nem” négyzet bejelölésével.**

**A kutatás címe és részletei:** Aknaszlatina község kockázatértékelési megközelítése. Ez a kutatás egy nagyobb Európai Unió projekt „Ukraina katasztrófakockázat csökkentése és a kockázatkezelés javítása a kárpátaljai régióban” részét képezi - ImProDiReT (Laborvezető (a továbbiakban: Lab.)):Prof. Bartel Van de Walle, EU Koordinációs Főigazgatóság 783232 projekt a kockázatkezelésről. Több információ a kutatásról itt található: <http://www.improdiRET.eu/>

**Kutató:** Dr. Abby Muricho Onencan (a továbbiakban “Kutató”), Többfunkciós rendszerek Tanszéke, Szakpolitikai elemzés, Műszaki, Politikai és Menedzsment Kar, Delft Műszaki Egyetem, NED

**A kutatás célja:** A kutatás célja - Aknaszlatina község biztonságosá alakításának felmérése. Az adatok hozzájárulnak a sóbányák közelében fekvő föld összeomlásához kapcsolódó kockázatok csökkentésére irányuló tervhöz.

**Titoktartás és adatkezelés:** Információkat gyűjtünk a kockázatértékelésről, a katasztrófakockázat-felkészültségről és a helymeghatározásról. Továbbá adatokat gyűjtünk a talaj süllyedési kockázatával kapcsolatos közösségi felfogás térképezéséhez. Az Ön adatainak feldolgozása és tárolása az Európai Unió 2016/679 általános adatvédelmi rendeletével összhangban történik. Önnek bármikor jogában áll hozzáférést kérni személyes adataihoz, azok megváltoztatását vagy törlését. Bármely személyes adat, név, személyazonosság, lakcím, meg lesz változtatva, elhomályosítva az Ön anonimitásának biztosítása érdekében. Az anonimizált adatok felhasználhatók kutatásokhoz és publikációkhoz. A projekt időtartama alatt (2019. szeptember 1. - 2020. február 29.) a személyes adatok csak a projekt tagjai számára lesznek elérhetők (Kutató, Lab). Az adatokat Hollandiában tárolják, és soha nem adják át harmadik felek számára. A projekt befejezése után az anonimizált adatokat (nem személyes adatokat) 10 évig archiválják, és bárki számára elérhetők lesznek.

**Az eljárások magyarázata:** Felkérjük, hogy válaszoljon a kérdésekre a talaj süllyedési kockázatáról kapcsolatos felfogásról Aknaszlatina községben, felkészültsége szintjéről és arról, hogy mennyire ragaszkodik a körzethez. A kérdések megválaszolásának becsült időtartama 15-30 perc.

**Kockázatok:** A felmérésben való részvétel fő kockázata az Ön személyes adatainak elfogásával függ össze a kutatás elvégzéséhez megadott információk feldolgozása és tárolása során. A kutató minimálisra csökkenti a kockázatokat azáltal, hogy csak anonimizált adatokat használ fel, amelyeket nem lehet Önhöz visszavezetni, és végrehajtja a megfelelő tárolási és hozzáférés-ellenőrzési folyamatokat a projekt során és utána. Az adatok lehallgatásának kockázata így tehát minimális. A kutatásban való részvétel egyébként biztonságos a résztvevők számára. A felmérésben való részvétel egészségét nem veszélyezteti.

**Kérdések:**A kutatással és a felméréssel kapcsolatos kérdésekkel és / vagy megjegyzésekkel a Kutatóhoz fordulhatnak, Abby M. Onencan, TU Delft /Technológia, politika és ügyvitel Tanszék, Jaffalaan 5, 2628 BX Delft, Email: A.M.Onencan@tudelft.nl.

|                                                                                                                                                                                                                                                                                                                                                           | Igen                  | Nem                   |
|-----------------------------------------------------------------------------------------------------------------------------------------------------------------------------------------------------------------------------------------------------------------------------------------------------------------------------------------------------------|-----------------------|-----------------------|
| 1. Elolvastam, fel volt nekem olvasva a fenti információ. Lehetőség szerint tettem fel kérdéseket és mindegyikre kielégítően választ kaptam.                                                                                                                                                                                                              | <input type="radio"/> | <input type="radio"/> |
| 2. Önkéntesen vállaltam részvételmet a kutatásban. Megértem hogy bármely percben elutasíthatom a kérdésekre való válaszolást, és visszamondhatom a kutatásban való részvételmet bármilyen magyarázat nélkül.                                                                                                                                              | <input type="radio"/> | <input type="radio"/> |
| 3. Megértem hogy a kutatásban való részvételtem magába foglalja a személyes adataimhoz való hozzáférést az általam gyűjtött információ feldolgozásának és tárolásának folyamata alatt a kutatás végrehajtásának érdekében. Tudatában vagyok a Kutató által csökkentet kockázatról, amit az által ért el hogy kellő tárolási intézkedéseket hajtott végre. | <input type="radio"/> | <input type="radio"/> |
| 4. Tudatában vagyok az általam adott anonim információ felhasználásával más nyomtatványokban, kutatásokban.                                                                                                                                                                                                                                               | <input type="radio"/> | <input type="radio"/> |
| 5. Megértem, hogy a személyes adataim, melyek azonosíthatnak engem, és a lakcímem nem lesznek megosztva a kutatás során a kutatásvezető által.                                                                                                                                                                                                            | <input type="radio"/> | <input type="radio"/> |

### Q1.5. Aláírás

SIGN  
HERE

---

clear

### Demographics

#### Q2.1. Kor

- |                                |                                                          |
|--------------------------------|----------------------------------------------------------|
| <input type="radio"/> 18 alatt | <input type="radio"/> 55-64                              |
| <input type="radio"/> 18-24    | <input type="radio"/> 65-74                              |
| <input type="radio"/> 25-34    | <input type="radio"/> 75-84                              |
| <input type="radio"/> 35-44    | <input type="radio"/> Egyéb                              |
| <input type="radio"/> 45-54    | <input style="width: 390px; height: 15px;" type="text"/> |

#### Q2.2. Nem

- Férfi
- Nő

#### Q2.3. Végzettség

- |                                   |                                        |
|-----------------------------------|----------------------------------------|
| <input type="radio"/> Nincs       | <input type="radio"/> Bölcsész fokozat |
| <input type="radio"/> Alap        | <input type="radio"/> Mesteri fokozat  |
| <input type="radio"/> Középiskola | <input type="radio"/> Doktori fokozat  |
| <input type="radio"/> Szakiskola  | <input type="radio"/> Doktorátus utáni |

#### Q2.4. Családi állapot

- |                                   |                              |
|-----------------------------------|------------------------------|
| <input type="radio"/> Egyedülálló | <input type="radio"/> Elvált |
| <input type="radio"/> Házas       | <input type="radio"/> Özvegy |

#### Q2.5. Vallás

- |                                   |                                 |
|-----------------------------------|---------------------------------|
| <input type="radio"/> Bizonytalan | <input type="radio"/> Buddhista |
|-----------------------------------|---------------------------------|

- Ateista
- Ortodox
- Romai Katolikus
- Protestáns
- Judaista

- Pogány
- Görög Katolikus
- Jehova Tanú
- Nem vallásos / vallástalan
- Egyéb, kérem pontosítsa

## Q2.6. Etnikai hovatartozás

- Ukrán
- Ruszin
- Magyar
- Román
- Róma

- Orosz
- Szlovák
- Cseh
- Német
- Egyébb, kérem pontosítsa

## Q2.7. Évi bejövétel

- Alacsony (\$1.90/nap alatt)
- Közép

- Magas

## Q2.8. Lakcím (Utca neve)

Q2.9.  
Az alábbi táblázaton jelölje lakohelyének, munkahelyének, gyermekei iskolájának, templomnak, amelyben jár, vállalkozásának elhelyezkedését. Jelölje meg csak azokat, amelyek Önt illetik. (Használja a térképet).

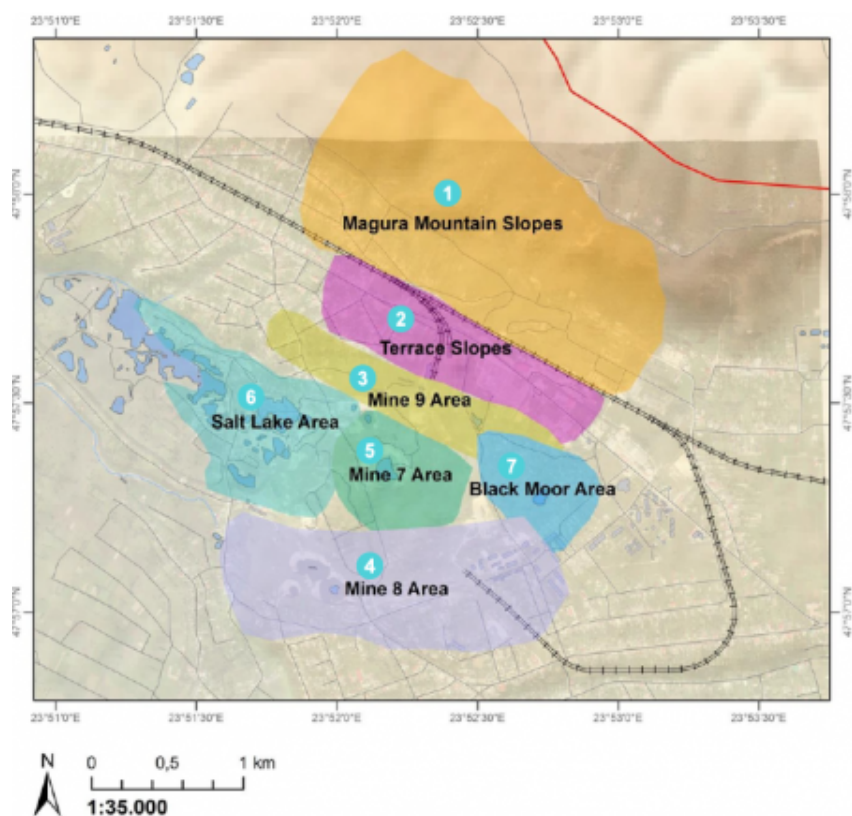

|                                                      | Lakóhely              | Munkahely             | Iskola                | Templom               | Vállalkozás           | Gyakran látogatott terület | Bérel lakást/házat    |
|------------------------------------------------------|-----------------------|-----------------------|-----------------------|-----------------------|-----------------------|----------------------------|-----------------------|
| 1. Magura Hegy környéke                              | <input type="radio"/>      | <input type="radio"/> |
| 2. Főútvonal környéke                                | <input type="radio"/>      | <input type="radio"/> |
| 3. 9-es bánya környéke                               | <input type="radio"/>      | <input type="radio"/> |
| 4. 8-as bánya környéke                               | <input type="radio"/>      | <input type="radio"/> |
| 5. 7-es bánya környéke                               | <input type="radio"/>      | <input type="radio"/> |
| 6. Sós tavak környéke                                | <input type="radio"/>      | <input type="radio"/> |
| 7. Lakónegyed környéke (ötmeletes épületek)          | <input type="radio"/>      | <input type="radio"/> |
| 8. Egyébb, kérem pontosítsa<br><input type="text"/>  | <input type="radio"/>      | <input type="radio"/> |
| 9. Egyébb, kérem pontosítsa<br><input type="text"/>  | <input type="radio"/>      | <input type="radio"/> |
| 10. Egyébb, kérem pontosítsa<br><input type="text"/> | <input type="radio"/>      | <input type="radio"/> |

### Household

#### Q3.1. Hány éve él Aknaszlatinán?

#### Q3.2. Háztípusa

- Teljes tulajdonában van
- Albérlet
- Jelzáloggal terhelt
- Egyébb, kérem pontosítsa

#### Q3.3. Milyen méretű a lakása/háza?

#### Q3.4. Milyen típusu a családja?

- Kis család
- Nagy család
- Egyedülálló szülő
- Gyermektelen
- Egyébb, kérem pontosítsa

#### Q3.5. Milyen az élethelyzete?

- Egyedül
- Együttlakás
- Teljes család
- Több család
- Szülőkkel, nagyszülőkkel
- Egyébb, kérem pontosítsa

Q3.6. A családtagjai között van-e fogyatékos személy (mozgássérült, látássérült, hallássérült, szellemi fogyatékos)?

- Igen
- Nem

#### Place Attachment Scale

Q4.1. Kérem jelölje be mennyire ért egyet vagy nem ért egyet az alábbi állításokkal. Aknaszlatina fontos számomra, mert:

|                                                                                                                                                     | Egyáltalán nem érték egyet | Nem értek egyet       | Nem cáfolom, de nem is erősítem meg | Egyet értek           | Teljesen egyet értek  |
|-----------------------------------------------------------------------------------------------------------------------------------------------------|----------------------------|-----------------------|-------------------------------------|-----------------------|-----------------------|
| 1. Határvárosként sok lehetőséget biztosít.                                                                                                         | <input type="radio"/>      | <input type="radio"/> | <input type="radio"/>               | <input type="radio"/> | <input type="radio"/> |
| 2. Ezen a területen élnek a barátaim, akik anyagilag képesek engem támogatni.                                                                       | <input type="radio"/>      | <input type="radio"/> | <input type="radio"/>               | <input type="radio"/> | <input type="radio"/> |
| 3. Itt könnyen jutok kölcsönökhöz.                                                                                                                  | <input type="radio"/>      | <input type="radio"/> | <input type="radio"/>               | <input type="radio"/> | <input type="radio"/> |
| 4. Nem is gondolhatok jobb helyre mint ez, mert itt nagyon termékeny a föld.                                                                        | <input type="radio"/>      | <input type="radio"/> | <input type="radio"/>               | <input type="radio"/> | <input type="radio"/> |
| 5. Ez a hely megélhetőségi lehetőségeket biztosít számomra, melyeket más hely nem biztosíthat.                                                      | <input type="radio"/>      | <input type="radio"/> | <input type="radio"/>               | <input type="radio"/> | <input type="radio"/> |
| 6. A turizmus jól fut itt.                                                                                                                          | <input type="radio"/>      | <input type="radio"/> | <input type="radio"/>               | <input type="radio"/> | <input type="radio"/> |
| 7. Az aknaszlatinai só minősége összehasonlíthatatlan a sóval bármely más területről.                                                               | <input type="radio"/>      | <input type="radio"/> | <input type="radio"/>               | <input type="radio"/> | <input type="radio"/> |
| 8. Ez az egyetlen ház, amit építettem.                                                                                                              | <input type="radio"/>      | <input type="radio"/> | <input type="radio"/>               | <input type="radio"/> | <input type="radio"/> |
| 9. Az elődjeim és családtagjaim itt éltek és itt vannak eltemetve.                                                                                  | <input type="radio"/>      | <input type="radio"/> | <input type="radio"/>               | <input type="radio"/> | <input type="radio"/> |
| 10. Itt az emberek ismernek engem.                                                                                                                  | <input type="radio"/>      | <input type="radio"/> | <input type="radio"/>               | <input type="radio"/> | <input type="radio"/> |
| 11. Az elődjeim elismert emberek voltak Aknaszlatinán.                                                                                              | <input type="radio"/>      | <input type="radio"/> | <input type="radio"/>               | <input type="radio"/> | <input type="radio"/> |
| 12. Aknaszlatina sok részén találkozhatok szüleim, nagyszüleim emlékeivel.                                                                          | <input type="radio"/>      | <input type="radio"/> | <input type="radio"/>               | <input type="radio"/> | <input type="radio"/> |
| 13. Családtagjaim dolgozhatnak Csehországban, Oroszországban, Magyarországon vagy más ukrán városban, de amellet még Aknaszlatina lakosai maradnak. | <input type="radio"/>      | <input type="radio"/> | <input type="radio"/>               | <input type="radio"/> | <input type="radio"/> |
| 14. Az etnikai eredetemnek köszönhetően én itt érzem magam jobban otthon, mint Ukrajna bármely más részén.                                          | <input type="radio"/>      | <input type="radio"/> | <input type="radio"/>               | <input type="radio"/> | <input type="radio"/> |
| 15. Én nem érzem magam jól, ha minden héten nem látogatom meg a templomunkat.                                                                       | <input type="radio"/>      | <input type="radio"/> | <input type="radio"/>               | <input type="radio"/> | <input type="radio"/> |
| 16. Az itt szervezett fesztiválok rendkívül fontosak számomra.                                                                                      | <input type="radio"/>      | <input type="radio"/> | <input type="radio"/>               | <input type="radio"/> | <input type="radio"/> |
| 17. Nekem tetszik az itteni iskolák, templomok nyelvi változatossága.                                                                               | <input type="radio"/>      | <input type="radio"/> | <input type="radio"/>               | <input type="radio"/> | <input type="radio"/> |
| 18. Én itt mindenféle támogatásban részesülök.                                                                                                      | <input type="radio"/>      | <input type="radio"/> | <input type="radio"/>               | <input type="radio"/> | <input type="radio"/> |

#### Land Subsidence Preparedness Scale

Q5.1. Készen áll-e az alábbi dolgokkal földomlás esetén? Kérem jelölje az alábbi választási lehetőségeket "igen", "bizonytalan" vagy "nem".

|                                                                                                     | Igen                  | Lehetséges            | Nem                   |
|-----------------------------------------------------------------------------------------------------|-----------------------|-----------------------|-----------------------|
| 1. Fontos dokumentumok hordozható tároló dobozban vagy széfben.                                     | <input type="radio"/> | <input type="radio"/> | <input type="radio"/> |
| 2. Otthoni leltár hordozható tároló dobozban vagy széfben.                                          | <input type="radio"/> | <input type="radio"/> | <input type="radio"/> |
| 3. A rádió teljes mértékben működik.                                                                | <input type="radio"/> | <input type="radio"/> | <input type="radio"/> |
| 4. Zseblámpák (elegendő elemmel) / gyertyák / hurrikánlámpák / tartalék generátor készenlétben van. | <input type="radio"/> | <input type="radio"/> | <input type="radio"/> |
| 5. Vészhelyzeti készlet, amely mindig kéz alatt van.                                                | <input type="radio"/> | <input type="radio"/> | <input type="radio"/> |
| 6. Tiszta ivóvíz.                                                                                   | <input type="radio"/> | <input type="radio"/> | <input type="radio"/> |
| 7. Elsősegély doboz.                                                                                | <input type="radio"/> | <input type="radio"/> | <input type="radio"/> |
| 8. Szükséges pénzügyi eljárások hirtelen kilakoltatás esetén.                                       | <input type="radio"/> | <input type="radio"/> | <input type="radio"/> |
| 9. Biztosítási kötvény (ingatlan, egészség, földterület)                                            | <input type="radio"/> | <input type="radio"/> | <input type="radio"/> |
| 10. Egy „családi kapcsolattartóval”, aki nem Aknaszlatinán lakik, sürgősségi reakciósi terv.        | <input type="radio"/> | <input type="radio"/> | <input type="radio"/> |

Q5.2. Kérem jelölje az alábbi tételek elkészítésének nehézségi mértékét az 5-pontos skála szerint "egyáltalán nem nehéz"-től a "rendkívül nehéz"-ig.

|                                                                                                   | Egyáltalán nem nehéz  | Egy kicsit nehéz      | Kissé nehéz           | Nagyon nehéz          | Rendkívül nehéz       |
|---------------------------------------------------------------------------------------------------|-----------------------|-----------------------|-----------------------|-----------------------|-----------------------|
| 1. Fontos dokumentumok hordozható tároló dobozban vagy széfben.                                   | <input type="radio"/> |
| 2. Otthoni leltár hordozható tároló dobozban vagy széfben.                                        | <input type="radio"/> |
| 3. A rádió teljes mértékben működik.                                                              | <input type="radio"/> |
| 4. Zseblámpák (elegendő elemmel) / gyertyák / hurrikánlámpák / tartalék generátor készletben van. | <input type="radio"/> |
| 5. Vészhelyzeti készlet, amely mindig kéz alatt van.                                              | <input type="radio"/> |
| 6. Tiszta ivóvíz.                                                                                 | <input type="radio"/> |
| 7. Elsősegély doboz.                                                                              | <input type="radio"/> |
| 8. Szükséges pénzügyi eljárások hirtelen kilakoltatás esetén.                                     | <input type="radio"/> |
| 9. Biztosítási kötvény (ingatlan, egészség, földterület)                                          | <input type="radio"/> |
| 10. Egy „családi kapcsolattartóval”, aki nem Aknaszlatinán lakik, sürgősségi reakálási terv.      | <input type="radio"/> |

**Q5.3. Kérem jelölje katasztrófakockázat felkészültségének mértékét mindegyik ponthoz „igen”, „bizonytalan” vagy „nem” jelöléssel.**

|                                                                                                                                                        | Igen                  | Lehetséges            | Nem                   |
|--------------------------------------------------------------------------------------------------------------------------------------------------------|-----------------------|-----------------------|-----------------------|
| 1. Tudja-e melyik kormányhivatalhoz kell fordulni földomlás esetén?                                                                                    | <input type="radio"/> | <input type="radio"/> | <input type="radio"/> |
| 2. Ismeri-e a vészhelyzeti figyelmeztető jelzéseket és riasztási értesítéseket Aknaszlatinán?                                                          | <input type="radio"/> | <input type="radio"/> | <input type="radio"/> |
| 3. Részt vesz-e közösségi megbeszéléseken a földomlás felkészültséggel kapcsolatos találkozúkon?                                                       | <input type="radio"/> | <input type="radio"/> | <input type="radio"/> |
| 4. Részt vesz az iskolák / nem kormányzati szervezetek / önkormányzati / kormány által szervezett földomlás felkészültséggel kapcsolatos találkozúkon? | <input type="radio"/> | <input type="radio"/> | <input type="radio"/> |
| 5. Ismeri-e családtagjai munkaépületének, iskolájának, napközi központjának vagy ápolóotthonának vészhelyzeti tervét?                                  | <input type="radio"/> | <input type="radio"/> | <input type="radio"/> |
| 6. Megtette-e a szükséges előkészületeket ingatlanát illetően a földomlás által okozott károk csökkentésére?                                           | <input type="radio"/> | <input type="radio"/> | <input type="radio"/> |
| 7. Ön vagy valaki a családjában rendelkezik-e elsősegélynyújtó képzéssel?                                                                              | <input type="radio"/> | <input type="radio"/> | <input type="radio"/> |
| 8. Tudja-e, hogyan kell előkészíteni ideiglenes menedékhelyeket?                                                                                       | <input type="radio"/> | <input type="radio"/> | <input type="radio"/> |

**Q5.4. Kérem jelölje az alábbi tételek elkészítésének nehézségi mértékét az 5-pontos skála szerint “egyáltalán nem nehéz”-től a “rendkívül nehéz”-ig.**

|                                                                                                                                                        | Egyáltalán nem nehéz  | Egy kicsit nehéz      | Kissé nehéz           | Nagyon nehéz          | Rendkívül nehéz       |
|--------------------------------------------------------------------------------------------------------------------------------------------------------|-----------------------|-----------------------|-----------------------|-----------------------|-----------------------|
| 1. Tudja-e melyik kormányhivatalhoz kell fordulni földomlás esetén?                                                                                    | <input type="radio"/> |
| 2. Ismeri-e a vészhelyzeti figyelmeztető jelzéseket és riasztási értesítéseket Aknaszlatinán?                                                          | <input type="radio"/> |
| 3. Részt vesz-e közösségi megbeszéléseken a földomlás felkészültséggel kapcsolatos találkozúkon?                                                       | <input type="radio"/> |
| 4. Részt vesz az iskolák / nem kormányzati szervezetek / önkormányzati / kormány által szervezett földomlás felkészültséggel kapcsolatos találkozúkon? | <input type="radio"/> |
| 5. Ismeri-e családtagjai munkaépületének, iskolájának, napközi központjának vagy ápolóotthonának vészhelyzeti tervét?                                  | <input type="radio"/> |
| 6. Megtette-e a szükséges előkészületeket ingatlanát illetően a földomlás által okozott károk csökkentésére?                                           | <input type="radio"/> |
| 7. Ön vagy valaki a családjában rendelkezik-e elsősegélynyújtó képzéssel?                                                                              | <input type="radio"/> |
| 8. Tudja-e, hogyan kell előkészíteni ideiglenes menedékhelyeket?                                                                                       | <input type="radio"/> |

#### Solotvyno Community-based Risk Evaluation

**Q6.1. Véleménye szerint milyen szintű a veszély az alábbi területeken élő vagy vállalkozó emberek részére?(a Q2.8 térkép szerint)**

|                         | KATASZTRÓFÁLIS (azonnali áttelepítés) | KRITIKUS (nagyon veszélyes, az ott élés nem ajánlott) | MÉRSÉKELT (kockázatcsökkentésre van szükség) | KISEBB (csak bizonyos helyeken veszélyes, amik elkerülhetőek) | JELENTÉKTELEN (általában biztonságos) |
|-------------------------|---------------------------------------|-------------------------------------------------------|----------------------------------------------|---------------------------------------------------------------|---------------------------------------|
| 1. Magura Hegy környéke | <input type="radio"/>                 | <input type="radio"/>                                 | <input type="radio"/>                        | <input type="radio"/>                                         | <input type="radio"/>                 |
| 2. Főútvonal környéke   | <input type="radio"/>                 | <input type="radio"/>                                 | <input type="radio"/>                        | <input type="radio"/>                                         | <input type="radio"/>                 |
| 3. 9-es bánya környéke  | <input type="radio"/>                 | <input type="radio"/>                                 | <input type="radio"/>                        | <input type="radio"/>                                         | <input type="radio"/>                 |

|                                                 | KATASZTROFÁLIS<br>(azonnali áttelepítés) | KRITIKUS (nagyon<br>veszélyes, az ott élés<br>nem ajánlott) | MÉRSEKELT<br>(kockázatsökkentésre<br>van szükség ) | KISEBB (csak bizonyos<br>helyeken veszélyes,<br>amik elkerülhetőek) | JELENTÉKTELEN<br>(általában biztonságos) |
|-------------------------------------------------|------------------------------------------|-------------------------------------------------------------|----------------------------------------------------|---------------------------------------------------------------------|------------------------------------------|
| 4. 8-as bánya környéke                          | <input type="radio"/>                    | <input type="radio"/>                                       | <input type="radio"/>                              | <input type="radio"/>                                               | <input type="radio"/>                    |
| 5. 7-es bánya környéke                          | <input type="radio"/>                    | <input type="radio"/>                                       | <input type="radio"/>                              | <input type="radio"/>                                               | <input type="radio"/>                    |
| 6. Sós tavak környéke                           | <input type="radio"/>                    | <input type="radio"/>                                       | <input type="radio"/>                              | <input type="radio"/>                                               | <input type="radio"/>                    |
| 7. Lakónegyed környéke (ötemeletes<br>épületek) | <input type="radio"/>                    | <input type="radio"/>                                       | <input type="radio"/>                              | <input type="radio"/>                                               | <input type="radio"/>                    |

06.2. Véleménye szerint mi a valószínűsége annak, hogy a következő földomlással kapcsolatos következmények bekövetkeznek, ha a jelenlegi helyzetben nem változtatunk?

|                                                                           | Nagy a<br>valószínűség | Lehetséges            | Távoli                | Valószínűtlen         | Rendkívül<br>lehetetlen |
|---------------------------------------------------------------------------|------------------------|-----------------------|-----------------------|-----------------------|-------------------------|
| 1. Élet / életek vesztese.                                                | <input type="radio"/>  | <input type="radio"/> | <input type="radio"/> | <input type="radio"/> | <input type="radio"/>   |
| 2. Súlyos veszteségek (helyi lakók és turisták).                          | <input type="radio"/>  | <input type="radio"/> | <input type="radio"/> | <input type="radio"/> | <input type="radio"/>   |
| 3. Gazdasági veszteség (sérült / összeomlott épületek és infrastruktúra). | <input type="radio"/>  | <input type="radio"/> | <input type="radio"/> | <input type="radio"/> | <input type="radio"/>   |
| 4. Ivóvízhiány (a víz minőségének tönkretétele).                          | <input type="radio"/>  | <input type="radio"/> | <input type="radio"/> | <input type="radio"/> | <input type="radio"/>   |
| 5. Iskolahiány (ukrán, magyar, román, stb.)                               | <input type="radio"/>  | <input type="radio"/> | <input type="radio"/> | <input type="radio"/> | <input type="radio"/>   |
| 6. Mezőgazdasági földek szikesedése<br>(a só a talajba jut).              | <input type="radio"/>  | <input type="radio"/> | <input type="radio"/> | <input type="radio"/> | <input type="radio"/>   |
| 7. A Tisza és a Duna folyók szikesedése (az áramlás irányával)            | <input type="radio"/>  | <input type="radio"/> | <input type="radio"/> | <input type="radio"/> | <input type="radio"/>   |
| 8. Munkavesztés.                                                          | <input type="radio"/>  | <input type="radio"/> | <input type="radio"/> | <input type="radio"/> | <input type="radio"/>   |
| 9. Hajléktalanság.                                                        | <input type="radio"/>  | <input type="radio"/> | <input type="radio"/> | <input type="radio"/> | <input type="radio"/>   |
| 10. Nincs közlekedési infrastruktúra (vasúti és főutak megsemmisítése).   | <input type="radio"/>  | <input type="radio"/> | <input type="radio"/> | <input type="radio"/> | <input type="radio"/>   |
| 11. Nincs főzőgáz (a gázvezeték megsemmisülése).                          | <input type="radio"/>  | <input type="radio"/> | <input type="radio"/> | <input type="radio"/> | <input type="radio"/>   |
| 12. Az aknaszlatinai és a Rahói járási villamos állomás megsemmisítése.   | <input type="radio"/>  | <input type="radio"/> | <input type="radio"/> | <input type="radio"/> | <input type="radio"/>   |

06.3. Tegyük fel, hogy azzal az alappal, amit eddig tud a földomlás veszélyéről Aknaszlatinán, házat kapott bármelyik alábbi területen, mik lennének a teendői? Válasszon '**AVálasztás**' (azonnal elfogadja a tulajdonjogot és beköltözik), '**B Választás**' (csak bizonyos biztonsági intézkedések végrehajtása után fogadja el a tulajdonjogot), vagy '**C Választás**' (visszautasítja a lehetőséget).

|                                                 | A tulajdonjog azonnali elfogadása és<br>beköltözés | A tulajdonjog elfogadása bizonyos<br>biztonsági intézkedések végrehajtása után | A lehetőség visszautasítása |
|-------------------------------------------------|----------------------------------------------------|--------------------------------------------------------------------------------|-----------------------------|
| 1. Magura Hegy környéke                         | <input type="radio"/>                              | <input type="radio"/>                                                          | <input type="radio"/>       |
| 2. Főútvonal környéke                           | <input type="radio"/>                              | <input type="radio"/>                                                          | <input type="radio"/>       |
| 3. 9-es bánya környéke                          | <input type="radio"/>                              | <input type="radio"/>                                                          | <input type="radio"/>       |
| 4. 8-as bánya környéke                          | <input type="radio"/>                              | <input type="radio"/>                                                          | <input type="radio"/>       |
| 5. 7-es bánya környéke                          | <input type="radio"/>                              | <input type="radio"/>                                                          | <input type="radio"/>       |
| 6. Sós tavak környéke                           | <input type="radio"/>                              | <input type="radio"/>                                                          | <input type="radio"/>       |
| 7. Lakónegyed környéke (ötemeletes<br>épületek) | <input type="radio"/>                              | <input type="radio"/>                                                          | <input type="radio"/>       |

06.4. Tegyük fel, hogy azzal az alappal, amit eddig tud a földomlás veszélyéről Aknaszlatinán, működési engedélyt kapott egy turisztikai üdülöhely felépítésére bármelyik alábbi területen, mik lennének a teendői? Válasszon '**AVálasztás**' (elfogadja a működési engedélyt és azonnal elkezd az üdülöhely építését) '**B Választás**' (csak bizonyos biztonsági intézkedések végrehajtása után fogadja el a működési engedélyt), vagy '**C Választás**' (visszautasítja a működési engedélyt).

|                         | Az engedély azonnali elfogadása és az<br>építés elkezdése | Az engedély elfogadása csak bizonyos<br>biztonsági intézkedések végrehajtása után | Az engedély visszautasítása |
|-------------------------|-----------------------------------------------------------|-----------------------------------------------------------------------------------|-----------------------------|
| 1. Magura Hegy környéke | <input type="radio"/>                                     | <input type="radio"/>                                                             | <input type="radio"/>       |
| 2. Főútvonal környéke   | <input type="radio"/>                                     | <input type="radio"/>                                                             | <input type="radio"/>       |
| 3. 9-es bánya környéke  | <input type="radio"/>                                     | <input type="radio"/>                                                             | <input type="radio"/>       |
| 4. 8-as bánya környéke  | <input type="radio"/>                                     | <input type="radio"/>                                                             | <input type="radio"/>       |
| 5. 7-es bánya környéke  | <input type="radio"/>                                     | <input type="radio"/>                                                             | <input type="radio"/>       |
| 6. Sós tavak környéke   | <input type="radio"/>                                     | <input type="radio"/>                                                             | <input type="radio"/>       |

|                                              | Az engedély azonnali elfogadása és az építés elkezdése | Az engedély elfogadása csak bizonyos biztonsági intézkedések végrehajtása után | Az engedély visszautasítása |
|----------------------------------------------|--------------------------------------------------------|--------------------------------------------------------------------------------|-----------------------------|
| 7. Lakónegyed környéke (ötemeletes épületek) | <input type="radio"/>                                  | <input type="radio"/>                                                          | <input type="radio"/>       |

Q6.5. Tegyük fel, hogy azzal az alappal, amit eddig tud a földomlás veszélyéről Aknaszlatinán, engedélyt kapott a só bányászatára és egy speleoterápiai (sóterápia) kórház felépítésére bármelyik alábbi területen, mik lennének a teendői? Válasszon '**AVálasztás**' (elfogadja az engedélyt és azonnal elindítja a bányászatot és az építkezést), '**B Választás**' (csak bizonyos biztonsági intézkedések végrehajtása után fogadja el az engedélyt), vagy '**C Választás**' (visszautasítja a működési engedélyt).

|                                              | Az engedély azonnali elfogadása és a bányászat, építkezés indítása | Az engedély elfogadása csak bizonyos biztonsági intézkedések végrehajtása után | Az engedély visszautasítása |
|----------------------------------------------|--------------------------------------------------------------------|--------------------------------------------------------------------------------|-----------------------------|
| 1. Magura Hegy környéke                      | <input type="radio"/>                                              | <input type="radio"/>                                                          | <input type="radio"/>       |
| 2. Főútvonal környéke                        | <input type="radio"/>                                              | <input type="radio"/>                                                          | <input type="radio"/>       |
| 3. 9-es bánya környéke                       | <input type="radio"/>                                              | <input type="radio"/>                                                          | <input type="radio"/>       |
| 4. 8-as bánya környéke                       | <input type="radio"/>                                              | <input type="radio"/>                                                          | <input type="radio"/>       |
| 5. 7-es bánya környéke                       | <input type="radio"/>                                              | <input type="radio"/>                                                          | <input type="radio"/>       |
| 6. Sós tavak környéke                        | <input type="radio"/>                                              | <input type="radio"/>                                                          | <input type="radio"/>       |
| 7. Lakónegyed környéke (ötemeletes épületek) | <input type="radio"/>                                              | <input type="radio"/>                                                          | <input type="radio"/>       |

Q6.6. On szerint hogyan lehetne megoldani a földomlás problémáját? Válasszon '**AVálasztás**' (100% kivitelezés), '**B Választás**' (kivitelezés bizonyos szintig), vagy '**C Választás**' (inkább nem változtatnék a jelenlegi helyzeten).

|                                                                                       | 100% kivitelezés      | Kivitelezés egy bizonyos szintig | Inkább nem változtatnék a jelenlegi helyzeten |
|---------------------------------------------------------------------------------------|-----------------------|----------------------------------|-----------------------------------------------|
| 1. Kitisztítani a sós tavakat.                                                        | <input type="radio"/> | <input type="radio"/>            | <input type="radio"/>                         |
| 2. Megerősíteni a tartófalakat.                                                       | <input type="radio"/> | <input type="radio"/>            | <input type="radio"/>                         |
| 3. Felgyorsítani a sóbányászati társaság felszámolását.                               | <input type="radio"/> | <input type="radio"/>            | <input type="radio"/>                         |
| 4. Létrehozni egy előrejelző árvíz figyelmeztető rendszert.                           | <input type="radio"/> | <input type="radio"/>            | <input type="radio"/>                         |
| 5. Helyreállítani a rossz állapotú infrastruktúrát.                                   | <input type="radio"/> | <input type="radio"/>            | <input type="radio"/>                         |
| 6. Megőrizni a régi bányászati emlékeket.                                             | <input type="radio"/> | <input type="radio"/>            | <input type="radio"/>                         |
| 7. Kifejleszteni egy ivóvíz-hálózatot a sós tavak mellett levő terület számára.       | <input type="radio"/> | <input type="radio"/>            | <input type="radio"/>                         |
| 8. Kifejleszteni egy iszapvezeték rendszert a sós tavak mellett levő terület számára. | <input type="radio"/> | <input type="radio"/>            | <input type="radio"/>                         |
| 9. Átirányítani és felújítani szennyvízcsatornák rendszerét.                          | <input type="radio"/> | <input type="radio"/>            | <input type="radio"/>                         |
| 10. Betölteni a gödröget.                                                             | <input type="radio"/> | <input type="radio"/>            | <input type="radio"/>                         |
| 11. Kitisztítani a sós tavakat.                                                       | <input type="radio"/> | <input type="radio"/>            | <input type="radio"/>                         |
| 12. Lezárni a régi fúrólukákat és aknákat.                                            | <input type="radio"/> | <input type="radio"/>            | <input type="radio"/>                         |
| 13. Szigorúan alkalmazni az építkezési szabályokat és törvényeket.                    | <input type="radio"/> | <input type="radio"/>            | <input type="radio"/>                         |
| 14. Tiltalmi zónákat hozni létre és ezeket elkeríteni.                                | <input type="radio"/> | <input type="radio"/>            | <input type="radio"/>                         |
| 15. Visszaszerezni a tilalom zónában levő földet.                                     | <input type="radio"/> | <input type="radio"/>            | <input type="radio"/>                         |
| 16. Megállapítani a kitelepítési zónák területét Aknaszlatinán és környékén.          | <input type="radio"/> | <input type="radio"/>            | <input type="radio"/>                         |
| 17. Kitelepíteni a lakónegyedben élő embereket.                                       | <input type="radio"/> | <input type="radio"/>            | <input type="radio"/>                         |
| 18. Más veszélyeztetett területeken élő lakosok áttelepítése.                         | <input type="radio"/> | <input type="radio"/>            | <input type="radio"/>                         |
| 19. Eltávolítani az aknákat és más tárgyakat.                                         | <input type="radio"/> | <input type="radio"/>            | <input type="radio"/>                         |
| 20. Lebontani a felszínen levő régi és nem biztonságos bányászati infrastruktúrákat.  | <input type="radio"/> | <input type="radio"/>            | <input type="radio"/>                         |
| 21. Lebontani a nem biztonságos épületeket.                                           | <input type="radio"/> | <input type="radio"/>            | <input type="radio"/>                         |
| 22. Lebontani a nem biztonságos infrastruktúrákat.                                    | <input type="radio"/> | <input type="radio"/>            | <input type="radio"/>                         |

Q6.7. Véleménye szerint mit kell **Megszüntetni** ahhoz, hogy a földomlás problémája megoldódjon? Válasszon '**AVálasztás**' (100% megállítani), '**B Választás**' (megállítani csak egy bizonyos szintig), vagy '**C Választás**' (nem változtatnék a jelenlegi helyzeten).



|                                                                                                | 100% Megszüntetni     | Megszüntetni csak egy bizonyos szintig | Nem változtatnék a jelenlegi helyzeten |
|------------------------------------------------------------------------------------------------|-----------------------|----------------------------------------|----------------------------------------|
| 1. Megszüntetni a bányák földalatti előntését.                                                 | <input type="radio"/> | <input type="radio"/>                  | <input type="radio"/>                  |
| 2. Megszüntetni a vízvezetékek szivárgását.                                                    | <input type="radio"/> | <input type="radio"/>                  | <input type="radio"/>                  |
| 3. Megszüntetni a szivárgást a 8. bánya közelében lévő szennyvízvezetékéből.                   | <input type="radio"/> | <input type="radio"/>                  | <input type="radio"/>                  |
| 4. Megszüntetni a sókitermelési engedélyek kiadását.                                           | <input type="radio"/> | <input type="radio"/>                  | <input type="radio"/>                  |
| 5. Megszüntetni a rekreációs tevékenységre jogosító engedélyek kiadását.                       | <input type="radio"/> | <input type="radio"/>                  | <input type="radio"/>                  |
| 6. Leállítani a földalatti sótermeléssel kapcsolatos terveket.                                 | <input type="radio"/> | <input type="radio"/>                  | <input type="radio"/>                  |
| 7. Leállítani a nyitott sótermeléssel kapcsolatos terveket.                                    | <input type="radio"/> | <input type="radio"/>                  | <input type="radio"/>                  |
| 8. Megszüntetni az aknaszlatinai sóbánya és a környező területek kiaknázását.                  | <input type="radio"/> | <input type="radio"/>                  | <input type="radio"/>                  |
| 9. Megszüntetni rekreációs terület kiaknázását.                                                | <input type="radio"/> | <input type="radio"/>                  | <input type="radio"/>                  |
| 10. Leállítani a sóoldat szivattyúzását elhagyott bányákból.                                   | <input type="radio"/> | <input type="radio"/>                  | <input type="radio"/>                  |
| 11. Megszüntetni a sóoldat és kősó felhasználását egészségügyi célból (kórház: speleoterápia). | <input type="radio"/> | <input type="radio"/>                  | <input type="radio"/>                  |
| 12. Leállítani a sós tavak területén folyó további építkezéseket.                              | <input type="radio"/> | <input type="radio"/>                  | <input type="radio"/>                  |
| 13. Megszüntetni a sós tavak szennyezését.                                                     | <input type="radio"/> | <input type="radio"/>                  | <input type="radio"/>                  |
| 14. Megszüntetni a hordalék kiaknázását a Tisza-folyó árterületén.                             | <input type="radio"/> | <input type="radio"/>                  | <input type="radio"/>                  |
| 15. Megszüntetni a fúrásokat.                                                                  | <input type="radio"/> | <input type="radio"/>                  | <input type="radio"/>                  |
| 16. Megszüntetni a szemét kihordását a földomlások környékére.                                 | <input type="radio"/> | <input type="radio"/>                  | <input type="radio"/>                  |

### Final Reflection

#### Q7.1.

Véleménye szerint a föld Aknaszlatinán javítható, helyreállítható?

- Igen
- Nem
- Lehetséges, kérem indokolja

#### Q7.2.

Köszönjük, hogy idejüket feláldozták a felmérés érdekében. A hasznos információért hálásak vagyunk Önnek. A válaszaik segítenek nekünk meghatározni a leghatékonyabb megoldásokat Aknaszlatina biztonságának visszaszerzése érdekében. Kérjük, olvassa beszámolóinkat a [www.improdirect.eu](http://www.improdirect.eu) oldalon, amely 2020-tól elérhető lesz. Ha bármilyen észrevétele van a felméréssel kapcsolatban, kérem, hagyjon megjegyzést alább.

Powered by Qualtrics
