# Supplementary material
Source: MDPI journal article supplement (https://www.mdpi.com/2071-1050/12/13/5461)
Supplement: s1 [file s1]

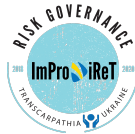

## ImProDiReT Risk Evaluation Approach for Solotvyno Municipality

English

### Informed Consent Form

#### Q1.1. Name of school

- ☐ Romanian Secondary School of Solotvyno
- ☐ Ukrainian Secondary School of Solotvyno
- ☐ Hungarian Secondary School named after Yanosh Bolyay of Solotvyno
- ☐ Romanian Lyceum of Solotvyno

#### Q1.2. Name of student / teacher

#### Q1.3. Type of participant (1)

- ☐ Teacher
- ☐ Student's Household
- ☐ Neighbour 1
- ☐ Neighbour 2

#### Q1.4.

**Before agreeing to participate in the study, it is important that you read the following explanation. After reading the explanation of the study (informed consent form), please, answer the following questions by ticking either the "Yes" or "No" boxes**

**Title and details of research:** Risk Evaluation Approach for the Solotvyno Municipality. This study is part of the larger European Union project "Improving Disaster Risk Reduction in the Transcarpathia Region", Ukraine - ImProDiReT (Principal Investigator (henceforth "PI"): Prof. Bartel Van de Walle, EU DG ECHO project 783232 on Risk Governance). More information on this project can be found here: <http://www.improdiret.eu/>

**Researcher:** Dr. Abby Muricho Onencan (henceforth "Researcher"), Department of Multi-Actor Systems, Section Policy Analysis, Faculty of Technology, Policy and Management, Delft University of Technology, NL

**Purpose of the research:** The purpose of the survey is to assess how we can make the Solotvyno community safe. The data will provide input for the community action plan to reduce risks associated to the collapse of the land near the salt mines.

**Confidentiality and data management:** We will collect information about the risk evaluation, the disaster risk preparedness and the place attachment. In addition, geo-referenced data will be collected to map the community perceptions on the land subsidence risk. Processing and storing of your data will be handled in accordance with the European Union 2016/679 General Data Protection Regulation. You have the right to request access to, change or erasure of your personal data at any time. Any personal sensitive data, such as names, identities, location, will be replaced, scrambled or blurred to ensure that anonymized data cannot be linked back to you. The anonymized data may be used for research and publications. For the project duration (September 1 2019 - February 29, 2020), personal information will only be accessible to the project members (the Researcher a PI). The data are stored in the Netherlands and are never made available to third parties. After the project, the anonymized data and research results (non-personal) will be archived for a period of 10 years and will be accessible to anyone.

**Explanation of procedures:** You will be invited to answer a set of questions about your perceptions of the land subsidence risk in Solotvyno municipality, your level of preparedness and how attached you are to the area. The estimated duration to answer the questions ranges from 15 - 30 minutes.

**Risks:** The main risks of participating in the study are linked to the interception of your personal data during the processing and storage of the information provided by you to complete this study. The researcher has minimized the risks by using only the anonymized data that cannot be linked back to you and taking the appropriate measures of storage and access control to secure the sensitive data during and after the project. The data interception risks are thus minimal. Participation in the survey is otherwise safe for the participants. By participating in this study, you do not undergo specific health risks.

**Questions:** Any questions concerning the research and the survey and/or in the case of issues due to the research can be directed to the researcher, Abby M. Onencan, TU Delft /Faculty of TPM, Jaffalaan 5, 2628 BX Delft, Email: [A.M.Onencan@tudelft.nl](mailto:A.M.Onencan@tudelft.nl).

Yes No

1. I have read the foregoing information, or it has been read to me. I have had the opportunity to ask questions about it and any questions I have asked were answered to my satisfaction.

☐ ☐

|                                                                                                                                                                                                                                                                                                                                                                                                      | Yes                   | No                    |
|------------------------------------------------------------------------------------------------------------------------------------------------------------------------------------------------------------------------------------------------------------------------------------------------------------------------------------------------------------------------------------------------------|-----------------------|-----------------------|
| 2. I voluntarily consent to be a participant in this study. I understand that I can refuse to answer questions and I can withdraw from the study at any time, without having to give a reason.                                                                                                                                                                                                       | <input type="radio"/> | <input type="radio"/> |
| 3. I understand that taking part in the study involves the risk of the interception of my personal data during the processing and storage of the information provided by me to complete this study. I furthermore understand that the researcher has minimized the risks by taking the appropriate measures of storage and access control to secure the sensitive data during and after the project. | <input type="radio"/> | <input type="radio"/> |
| 4. I understand that the anonymized information (anonymized survey transcript) I provide will be used for publications and other research-related activities (e.g., reports, website, blogs, etc.).                                                                                                                                                                                                  | <input type="radio"/> | <input type="radio"/> |
| 5. I understand that personal information collected about me that can identify me, where I live, will not be shared beyond the researcher and the PI.                                                                                                                                                                                                                                                | <input type="radio"/> | <input type="radio"/> |

Q1.5. Signature

×

SIGN  
HERE

clear

Demographics

Q2.1. Age

☐ Under 18

☐ 18-24

☐ 25-34

☐ 35-44

☐ 45-54

☐ 55-64

☐ 65-74

☐ 75-84

☐ Other

Q2.2. Gender

☐ Male

☐ Female

Q2.3. Highest completed education

☐ None

☐ Basic / Primary

☐ Secondary

☐ Vocational

☐ Bachelors

☐ Masters

☐ Doctorate

☐ Post-doctorate

Q2.4. Marital status

☐ Single

☐ Married

☐ Separated

☐ Widowed

Q2.5. Religion

☐ Not sure

☐ Atheism

☐ Buddhism

☐ Paganism

- ☐

Orthodox
- ☐

Roman Catholicism
- ☐

Protestantism
- ☐

Judaism
- ☐

☐

Hinduism

☐

Jehovah Witness

☐

Non-religious / unaffiliated

☐

Other

Q2.6. Ethnic origin

- ☐

Ukrainian
- ☐

Rusyn or Ruthenians
- ☐

Hungarian
- ☐

Romanian
- ☐

Roma
- ☐

Russian
- ☐

Slovak
- ☐

Czech
- ☐

German
- ☐

Other, please specify
- 

Q2.7. Annual Income

- ☐

Low (below \$1.90 a day)
- ☐

Middle
- ☐

High

Q2.8. Home address (Name of street)

Q2.9. Based on the zoning in the map (below), please indicate which area you reside, work, your children go to school, you go to church, conduct business, or rent apartments (houses). Only indicate the areas that apply to your circumstance.

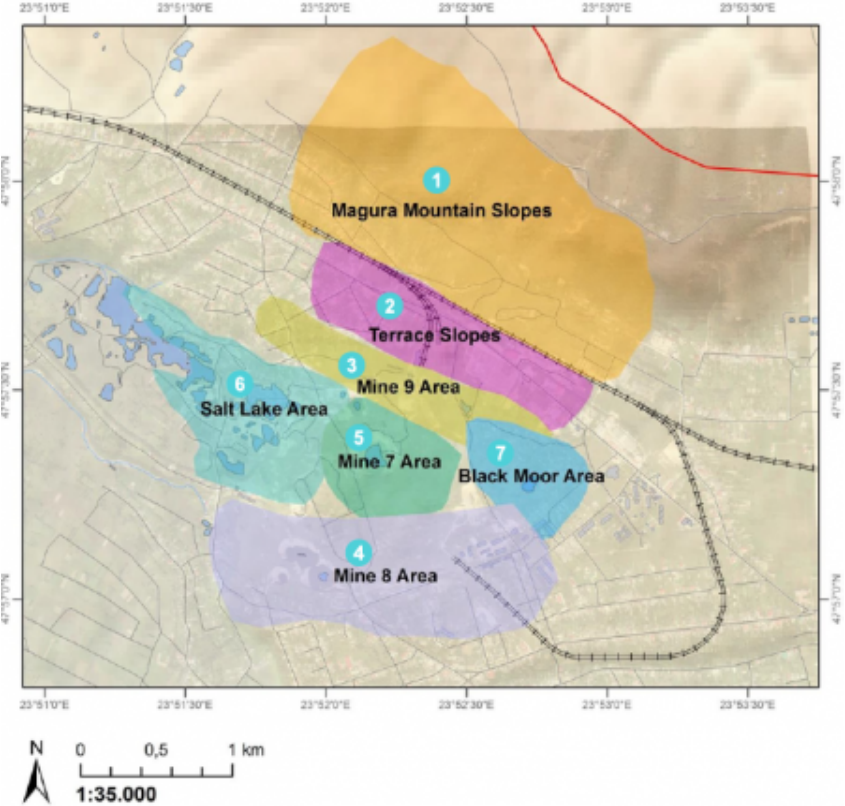

|                           | Reside                | Work                  | Children go to school | Attend church         | Have a business       | Regularly frequent the area | Rent apartments / house (s) |
|---------------------------|-----------------------|-----------------------|-----------------------|-----------------------|-----------------------|-----------------------------|-----------------------------|
| 1. Magura Mountain Slopes | <input type="radio"/>       | <input type="radio"/>       |
| 2. Terrace Slopes         | <input type="radio"/>       | <input type="radio"/>       |

|                                | Reside                | Work                  | Children go to school | Attend church         | Have a business       | Regularly frequent the area | Rent apartments / house (s) |
|--------------------------------|-----------------------|-----------------------|-----------------------|-----------------------|-----------------------|-----------------------------|-----------------------------|
| 3. Mine 9 area                 | <input type="radio"/>       | <input type="radio"/>       |
| 4. Mine 8 area                 | <input type="radio"/>       | <input type="radio"/>       |
| 5. Mine 7 area                 | <input type="radio"/>       | <input type="radio"/>       |
| 6. Salt Lake area              | <input type="radio"/>       | <input type="radio"/>       |
| 7. Blackmoor area              | <input type="radio"/>       | <input type="radio"/>       |
| 8. Other <input type="text"/>  | <input type="radio"/>       | <input type="radio"/>       |
| 9. Other <input type="text"/>  | <input type="radio"/>       | <input type="radio"/>       |
| 10. Other <input type="text"/> | <input type="radio"/>       | <input type="radio"/>       |

Household

Q3.1. How many years have you lived in Solotvyno?

Q3.2. What is your housing type?

- ☐ Fully owned
- ☐ Rented
- ☐ Mortgaged
- ☐  Other, please specify

Q3.3. What is your household size?

Q3.4. What is your family type?

- ☐ Nuclear
- ☐ Extended
- ☐ Single parent
- ☐ Childless
- ☐  Other, please specify

Q3.5. What is your living situation?

- ☐ House alone
- ☐ House with partner
- ☐ Nucleur Family
- ☐ Joint Family
- ☐ Extended Family
- ☐  Other, please specify

Q3.6. Does any member of your household have a disability (mobility, visual, hearing, cognitive)?

- ☐ Yes
- ☐ No

**Place Attachment Scale**

Q4.1. Please indicate, to what extent do you agree or disagree with the following statements? Solotvyno is important to me because:

|                                                                                                                                             | Strongly disagree     | Disagree              | Neither agree nor disagree | Agree                 | Strongly agree        |
|---------------------------------------------------------------------------------------------------------------------------------------------|-----------------------|-----------------------|----------------------------|-----------------------|-----------------------|
| 1. Being a border town, Solotvyno provides many opportunities.                                                                              | <input type="radio"/> | <input type="radio"/> | <input type="radio"/>      | <input type="radio"/> | <input type="radio"/> |
| 2. At this place, I have friends who can give me financial support.                                                                         | <input type="radio"/> | <input type="radio"/> | <input type="radio"/>      | <input type="radio"/> | <input type="radio"/> |
| 3. Here, I can get loans easily.                                                                                                            | <input type="radio"/> | <input type="radio"/> | <input type="radio"/>      | <input type="radio"/> | <input type="radio"/> |
| 4. I cannot think of a place other than this because I have fertile land here.                                                              | <input type="radio"/> | <input type="radio"/> | <input type="radio"/>      | <input type="radio"/> | <input type="radio"/> |
| 5. The place provides me with livelihood opportunities that no other place can offer.                                                       | <input type="radio"/> | <input type="radio"/> | <input type="radio"/>      | <input type="radio"/> | <input type="radio"/> |
| 6. Tourism business runs well here.                                                                                                         | <input type="radio"/> | <input type="radio"/> | <input type="radio"/>      | <input type="radio"/> | <input type="radio"/> |
| 7. The quality of salt in Solotvyno superior to other places.                                                                               | <input type="radio"/> | <input type="radio"/> | <input type="radio"/>      | <input type="radio"/> | <input type="radio"/> |
| 8. This is the only house that I have built.                                                                                                | <input type="radio"/> | <input type="radio"/> | <input type="radio"/>      | <input type="radio"/> | <input type="radio"/> |
| 9. My forefathers and family lived and were buried in Solotvyno.                                                                            | <input type="radio"/> | <input type="radio"/> | <input type="radio"/>      | <input type="radio"/> | <input type="radio"/> |
| 10. Here, people know me by my house.                                                                                                       | <input type="radio"/> | <input type="radio"/> | <input type="radio"/>      | <input type="radio"/> | <input type="radio"/> |
| 11. My forefathers were very well known persons in Solotvyno.                                                                               | <input type="radio"/> | <input type="radio"/> | <input type="radio"/>      | <input type="radio"/> | <input type="radio"/> |
| 12. I find the memory of my parents/grandparents in many parts of Solotvyno.                                                                | <input type="radio"/> | <input type="radio"/> | <input type="radio"/>      | <input type="radio"/> | <input type="radio"/> |
| 13. My family members can work in the Czech Republic, Russia, Hungary and Ukrainian cities, and still continue to be residents of Solotvyno | <input type="radio"/> | <input type="radio"/> | <input type="radio"/>      | <input type="radio"/> | <input type="radio"/> |
| 14. Due to my ethnic origin, I feel more at home in this place than any other part of Ukraine                                               | <input type="radio"/> | <input type="radio"/> | <input type="radio"/>      | <input type="radio"/> | <input type="radio"/> |
| 15. I cannot feel contented without visiting my village church once a week.                                                                 | <input type="radio"/> | <input type="radio"/> | <input type="radio"/>      | <input type="radio"/> | <input type="radio"/> |
| 16. The collective festivals organized here like are very important to me.                                                                  | <input type="radio"/> | <input type="radio"/> | <input type="radio"/>      | <input type="radio"/> | <input type="radio"/> |
| 17. I like the diversity in local languages, schools and churches.                                                                          | <input type="radio"/> | <input type="radio"/> | <input type="radio"/>      | <input type="radio"/> | <input type="radio"/> |
| 18. Being my ancestral place, I get all types of support here.                                                                              | <input type="radio"/> | <input type="radio"/> | <input type="radio"/>      | <input type="radio"/> | <input type="radio"/> |

**Land Subsidence Preparedness Scale**

Q5.1. Do you have the following ready in case the land subsidizes? Please check to each item either 'yes', 'unsure' or 'no.'

|                                                                                                                | Yes                   | Unsure                | No                    |
|----------------------------------------------------------------------------------------------------------------|-----------------------|-----------------------|-----------------------|
| 1. Important documents stored in a portable lockbox or safe-deposit box.                                       | <input type="radio"/> | <input type="radio"/> | <input type="radio"/> |
| 2. Home inventory stored it in a portable lockbox or safe-deposit box.                                         | <input type="radio"/> | <input type="radio"/> | <input type="radio"/> |
| 3. The radio is on and fully serviced.                                                                         | <input type="radio"/> | <input type="radio"/> | <input type="radio"/> |
| 4. Torch lights / flashlights (with enough batteries) /candles / hurricane lamps / backup generator are ready. | <input type="radio"/> | <input type="radio"/> | <input type="radio"/> |
| 5. Emergency Supplies Kit that can serve as a "grab and go" bag                                                | <input type="radio"/> | <input type="radio"/> | <input type="radio"/> |
| 6. Clean drinking water.                                                                                       | <input type="radio"/> | <input type="radio"/> | <input type="radio"/> |
| 7. First aid box.                                                                                              | <input type="radio"/> | <input type="radio"/> | <input type="radio"/> |
| 8. Necessary financial arrangements in case of a sudden evacuation.                                            | <input type="radio"/> | <input type="radio"/> | <input type="radio"/> |
| 9. Insurance policy (property, health, life, and/or land subsidence)                                           | <input type="radio"/> | <input type="radio"/> | <input type="radio"/> |
| 10. Emergency Response Communication Plan with a "family contact" outside Solotvyno?                           | <input type="radio"/> | <input type="radio"/> | <input type="radio"/> |

Q5.2. Please rate the difficulty of preparing for each item, by your household, on a five-point scale ranging from 'not difficult at all' to 'extremely difficult.'

|                                                                                                      | Not difficult at all  | A little difficult    | Somewhat difficult    | Very difficult        | Extremely difficult   |
|------------------------------------------------------------------------------------------------------|-----------------------|-----------------------|-----------------------|-----------------------|-----------------------|
| 1. Important documents stored in a portable lockbox or safe-deposit box.                             | <input type="radio"/> |
| 2. Home inventory stored it in a portable lockbox or safe-deposit box.                               | <input type="radio"/> |
| 3. The radio is on and fully serviced.                                                               | <input type="radio"/> |
| 4. Torch/flashlights (with enough batteries) /candles/ hurricane lamps / backup generator are ready. | <input type="radio"/> |
| 5. Emergency Supplies Kit that can serve as a "grab and go" bag                                      | <input type="radio"/> |
| 6. Clean drinking water.                                                                             | <input type="radio"/> |
| 7. First aid box.                                                                                    | <input type="radio"/> |

|                                                                                      | Not difficult at all  | A little difficult    | Somewhat difficult    | Very difficult        | Extremely difficult   |
|--------------------------------------------------------------------------------------|-----------------------|-----------------------|-----------------------|-----------------------|-----------------------|
| 8. Necessary financial arrangements in case of a sudden evacuation.                  | <input type="radio"/> |
| 9. Insurance policy (property, health, life, and/or land subsidence)                 | <input type="radio"/> |
| 10. Emergency Response Communication Plan with a "family contact" outside Solotvyno? | <input type="radio"/> |

Q5.3. Please indicate the extent of disaster risk preparedness by your household to each item, by checking either 'yes', 'unsure' or 'no.'

|                                                                                                                                                  | Yes                   | Unsure                | No                    |
|--------------------------------------------------------------------------------------------------------------------------------------------------|-----------------------|-----------------------|-----------------------|
| 1. Do you know which government agency to contact when the land subsidizes?                                                                      | <input type="radio"/> | <input type="radio"/> | <input type="radio"/> |
| 2. Do you know the emergency warning signals and alert notifications used in Solotvyno?                                                          | <input type="radio"/> | <input type="radio"/> | <input type="radio"/> |
| 3. Do you participate in community discussions regarding land subsidence preparedness?                                                           | <input type="radio"/> | <input type="radio"/> | <input type="radio"/> |
| 4. Do you attend land subsidence preparedness meetings held by schools / NGOs / Municipality / Government ?                                      | <input type="radio"/> | <input type="radio"/> | <input type="radio"/> |
| 5. Have you familiarized yourself with the emergency plans of your family member's employment building, school, daycare centre, or nursing home? | <input type="radio"/> | <input type="radio"/> | <input type="radio"/> |
| 6. Have you made the necessary property preparations to reduce the damage from land subsidence?                                                  | <input type="radio"/> | <input type="radio"/> | <input type="radio"/> |
| 7. Are you or someone in your family trained in first aid?                                                                                       | <input type="radio"/> | <input type="radio"/> | <input type="radio"/> |
| 8. Do you know how to prepare temporary shelter houses?                                                                                          | <input type="radio"/> | <input type="radio"/> | <input type="radio"/> |

Q5.4. Please rate the difficulty of preparing for each item, by your household, on a five-point scale ranging from 'not difficult at all' to 'extremely difficult.'

|                                                                                                                                                  | Not difficult at all  | A little difficult    | Somewhat difficult    | Very difficult        | Extremely difficult   |
|--------------------------------------------------------------------------------------------------------------------------------------------------|-----------------------|-----------------------|-----------------------|-----------------------|-----------------------|
| 1. Do you know which government agency (local, regional or central) to contact when you face land subsidence problems?                           | <input type="radio"/> |
| 2. Do you know the emergency warning signals and alert notifications used in Solotvyno?                                                          | <input type="radio"/> |
| 3. Do you participate in community discussions regarding land subsidence preparedness?                                                           | <input type="radio"/> |
| 4. Do you attend meetings held by schools / NGOs / Municipality / Government to improve land subsidence preparedness?                            | <input type="radio"/> |
| 5. Have you familiarized yourself with the emergency plans of your family member's employment building, school, daycare centre, or nursing home? | <input type="radio"/> |
| 6. Have you made the necessary property preparations to reduce the damage from land subsidence?                                                  | <input type="radio"/> |
| 7. Are you or someone in your family trained in first aid?                                                                                       | <input type="radio"/> |
| 8. Do you know how to prepare temporary shelter houses?                                                                                          | <input type="radio"/> |

#### Solotvyno Community-based Risk Evaluation

Q6.1. In your opinion, what is the level of danger for people living or conduct business(es) in the following areas? (refer to the Q2.8 map)

|                           | CATASTROPHIC<br>(Immediate relocation) | CRITICAL (Very dangerous, living there is not recommended ) | MODERATE (need for risk reduction measures to reduce the risks) | MINOR (risky only in specific places that can be avoided or cured) | INSIGNIFICANT (generally safe) |
|---------------------------|----------------------------------------|-------------------------------------------------------------|-----------------------------------------------------------------|--------------------------------------------------------------------|--------------------------------|
| 1. Magura Mountain Slopes | <input type="radio"/>                  | <input type="radio"/>                                       | <input type="radio"/>                                           | <input type="radio"/>                                              | <input type="radio"/>          |
| 2. Terrace Slopes         | <input type="radio"/>                  | <input type="radio"/>                                       | <input type="radio"/>                                           | <input type="radio"/>                                              | <input type="radio"/>          |
| 3. Mine 9 area            | <input type="radio"/>                  | <input type="radio"/>                                       | <input type="radio"/>                                           | <input type="radio"/>                                              | <input type="radio"/>          |
| 4. Mine 8 area            | <input type="radio"/>                  | <input type="radio"/>                                       | <input type="radio"/>                                           | <input type="radio"/>                                              | <input type="radio"/>          |
| 5. Mine 7 area            | <input type="radio"/>                  | <input type="radio"/>                                       | <input type="radio"/>                                           | <input type="radio"/>                                              | <input type="radio"/>          |
| 6. Salt Lake area         | <input type="radio"/>                  | <input type="radio"/>                                       | <input type="radio"/>                                           | <input type="radio"/>                                              | <input type="radio"/>          |
| 7. Black moor area        | <input type="radio"/>                  | <input type="radio"/>                                       | <input type="radio"/>                                           | <input type="radio"/>                                              | <input type="radio"/>          |

Q6.2. In your opinion, what is the likelihood/probability that the following subsidence related consequences will occur if the current situation continues unchecked?

|                                             | Highly Probable       | Probable              | Remote                | Improbable            | Extremely Improbable  |
|---------------------------------------------|-----------------------|-----------------------|-----------------------|-----------------------|-----------------------|
| 1. Loss of Life / Lives                     | <input type="radio"/> |
| 2. Severe casualties (locals and tourists). | <input type="radio"/> |

|                                                                                                     | Highly Probable       | Probable              | Remote                | Improbable            | Extremely Improbable  |
|-----------------------------------------------------------------------------------------------------|-----------------------|-----------------------|-----------------------|-----------------------|-----------------------|
| 3. Economic loss (damaged/collapsed buildings & infrastructure).                                    | <input type="radio"/> |
| 4. No drinking water (destruction of water facility)                                                | <input type="radio"/> |
| 5. No schools (Hungarian, Romanian etc.)                                                            | <input type="radio"/> |
| 6. Salination of agricultural grounds                                                               | <input type="radio"/> |
| 7. Salination of Tisza and Danube Rivers (downstream)                                               | <input type="radio"/> |
| 8. Loss of work                                                                                     | <input type="radio"/> |
| 9. Homelessness                                                                                     | <input type="radio"/> |
| 10. No transport infrastructure (destruction of rail and main roads)                                | <input type="radio"/> |
| 11. No cooking gas (destruction of the gas pipeline)                                                | <input type="radio"/> |
| 12. Backout in Soltvyno (long-term) and Rakiv region (destruction of the electric power substation) | <input type="radio"/> |

Q6.3. Suppose you have been given ownership to a house in any of the areas below, based on your current understanding of the land subsidence risk in Soltvyno, what would you choose? For each item, please select either '**Option A**' (accept ownership and move in immediately), '**Option B**' (only accept ownership if certain safety measures are implemented first), or '**Option C**' (decline to reside in the area)

|                           | Accept ownership and move in immediately | Only accept ownership if certain safety measures are implemented first | Decline to reside in the area |
|---------------------------|------------------------------------------|------------------------------------------------------------------------|-------------------------------|
| 1. Magura Mountain Slopes | <input type="radio"/>                    | <input type="radio"/>                                                  | <input type="radio"/>         |
| 2. Terrace Slopes         | <input type="radio"/>                    | <input type="radio"/>                                                  | <input type="radio"/>         |
| 3. Mine 9 area            | <input type="radio"/>                    | <input type="radio"/>                                                  | <input type="radio"/>         |
| 4. Mine 8 area            | <input type="radio"/>                    | <input type="radio"/>                                                  | <input type="radio"/>         |
| 5. Mine 7 area            | <input type="radio"/>                    | <input type="radio"/>                                                  | <input type="radio"/>         |
| 6. Salt Lake area         | <input type="radio"/>                    | <input type="radio"/>                                                  | <input type="radio"/>         |
| 7. Black moor area        | <input type="radio"/>                    | <input type="radio"/>                                                  | <input type="radio"/>         |

Q6.4. Suppose you have been given business license to construct your tourist resort in any of the areas below, based on your current understanding of the land subsidence risk in Soltvyno, what would you choose? For each item, please select either '**Option A**' (accept the license and construct the resort immediately), '**Option B**' (only accept the license if certain safety measures are implemented first), or '**Option C**' (decline to conduct any business in the area)

|                           | Accept the license and construct the resort immediately | Only accept the licence if certain safety measures are implemented first | Decline to conduct business in the area |
|---------------------------|---------------------------------------------------------|--------------------------------------------------------------------------|-----------------------------------------|
| 1. Magura Mountain Slopes | <input type="radio"/>                                   | <input type="radio"/>                                                    | <input type="radio"/>                   |
| 2. Terrace Slopes         | <input type="radio"/>                                   | <input type="radio"/>                                                    | <input type="radio"/>                   |
| 3. Mine 9 area            | <input type="radio"/>                                   | <input type="radio"/>                                                    | <input type="radio"/>                   |
| 4. Mine 8 area            | <input type="radio"/>                                   | <input type="radio"/>                                                    | <input type="radio"/>                   |
| 5. Mine 7 area            | <input type="radio"/>                                   | <input type="radio"/>                                                    | <input type="radio"/>                   |
| 6. Salt Lake area         | <input type="radio"/>                                   | <input type="radio"/>                                                    | <input type="radio"/>                   |
| 7. Black moor area        | <input type="radio"/>                                   | <input type="radio"/>                                                    | <input type="radio"/>                   |

Q6.5. Suppose you have been given license to mine salt and construct a speleotherapy hospital in any of the areas below, based on your current understanding of the land subsidence risk in Soltvyno, what would you choose? For each item, please select either '**Option A**' (accept the license and start mining and construction immediately), '**Option B**' (only accept the license if certain safety measures are implemented first), or '**Option C**' (decline to conduct any business in the area)

|                           | Accept the license and start mining and construction immediately | Only accept the licence if certain safety measures are implemented first | Decline to conduct business in the area |
|---------------------------|------------------------------------------------------------------|--------------------------------------------------------------------------|-----------------------------------------|
| 1. Magura Mountain Slopes | <input type="radio"/>                                            | <input type="radio"/>                                                    | <input type="radio"/>                   |
| 2. Terrace Slopes         | <input type="radio"/>                                            | <input type="radio"/>                                                    | <input type="radio"/>                   |
| 3. Mine 9 area            | <input type="radio"/>                                            | <input type="radio"/>                                                    | <input type="radio"/>                   |
| 4. Mine 8 area            | <input type="radio"/>                                            | <input type="radio"/>                                                    | <input type="radio"/>                   |
| 5. Mine 7 area            | <input type="radio"/>                                            | <input type="radio"/>                                                    | <input type="radio"/>                   |
| 6. Salt Lake area         | <input type="radio"/>                                            | <input type="radio"/>                                                    | <input type="radio"/>                   |
| 7. Black moor area        | <input type="radio"/>                                            | <input type="radio"/>                                                    | <input type="radio"/>                   |

Q6.6. What would you prefer to be **DONE** to resolve the subsidence problem? For each item, please select either '**Option A**' (prefer 100% implementation), '**Option B**' (prefer implementation to acceptable levels), or '**Option C**' (prefer no change to current situation).

|                                                                     | 100% implementation   | Implementation to acceptable levels | No change of current situation |
|---------------------------------------------------------------------|-----------------------|-------------------------------------|--------------------------------|
| 1. Clean the salt lakes                                             | <input type="radio"/> | <input type="radio"/>               | <input type="radio"/>          |
| 2. Strengthen the retaining wall systems                            | <input type="radio"/> | <input type="radio"/>               | <input type="radio"/>          |
| 3. Speedup liquidation of the salt mining company                   | <input type="radio"/> | <input type="radio"/>               | <input type="radio"/>          |
| 4. Implement an early flood warning system                          | <input type="radio"/> | <input type="radio"/>               | <input type="radio"/>          |
| 5. Restore critical infrastructure                                  | <input type="radio"/> | <input type="radio"/>               | <input type="radio"/>          |
| 6. Conserve old mining industrial archaeology                       | <input type="radio"/> | <input type="radio"/>               | <input type="radio"/>          |
| 7. Develop a drinking water network for the salt lakes zone         | <input type="radio"/> | <input type="radio"/>               | <input type="radio"/>          |
| 8. Develop a sludge line system for the salt lakes zone             | <input type="radio"/> | <input type="radio"/>               | <input type="radio"/>          |
| 9. Divert and update the sewer system                               | <input type="radio"/> | <input type="radio"/>               | <input type="radio"/>          |
| 10. Fill the sinkholes                                              | <input type="radio"/> | <input type="radio"/>               | <input type="radio"/>          |
| 11. Clean-up all the salt lakes                                     | <input type="radio"/> | <input type="radio"/>               | <input type="radio"/>          |
| 12. Cap old boreholes and shafts                                    | <input type="radio"/> | <input type="radio"/>               | <input type="radio"/>          |
| 13. Strict application of building codes and construction laws      | <input type="radio"/> | <input type="radio"/>               | <input type="radio"/>          |
| 14. Establish and fence off exclusion zones                         | <input type="radio"/> | <input type="radio"/>               | <input type="radio"/>          |
| 15. Reclaim land in the exclusion zones                             | <input type="radio"/> | <input type="radio"/>               | <input type="radio"/>          |
| 16. Identify relocation zones in or near Solotvyno                  | <input type="radio"/> | <input type="radio"/>               | <input type="radio"/>          |
| 17. Relocate inhabitants living near Black Moor                     | <input type="radio"/> | <input type="radio"/>               | <input type="radio"/>          |
| 18. Relocate inhabitants living in other high-risk zones            | <input type="radio"/> | <input type="radio"/>               | <input type="radio"/>          |
| 19. Remove mine shafts and other objects                            | <input type="radio"/> | <input type="radio"/>               | <input type="radio"/>          |
| 20. Demolish old and unsafe mining infrastructure above the surface | <input type="radio"/> | <input type="radio"/>               | <input type="radio"/>          |
| 21. Demolish unsafe buildings                                       | <input type="radio"/> | <input type="radio"/>               | <input type="radio"/>          |
| 22. Demolish unsafe infrastructures                                 | <input type="radio"/> | <input type="radio"/>               | <input type="radio"/>          |

Q6.7. What would you prefer to be **STOPPED** to resolve the subsidence problem? For each item, please select either '**Option A**' (prefer 100% implementation), '**Option B**' (prefer implementation to acceptable levels), or '**Option C**' (prefer no change to current situation)

|                                                                                                        | 100% stopped          | stopped only to acceptable levels | No change to current situation |
|--------------------------------------------------------------------------------------------------------|-----------------------|-----------------------------------|--------------------------------|
| 1. Stop underground flooding in the mines                                                              | <input type="radio"/> | <input type="radio"/>             | <input type="radio"/>          |
| 2. Stop leakage of water pipelines                                                                     | <input type="radio"/> | <input type="radio"/>             | <input type="radio"/>          |
| 3. Stop leakage from sewage pipelines near Mine 8                                                      | <input type="radio"/> | <input type="radio"/>             | <input type="radio"/>          |
| 4. Stop issuance of salt mining business licenses                                                      | <input type="radio"/> | <input type="radio"/>             | <input type="radio"/>          |
| 5. Stop issuance of recreation business licenses                                                       | <input type="radio"/> | <input type="radio"/>             | <input type="radio"/>          |
| 6. Stop future plans for shaft (underground) salt mining                                               | <input type="radio"/> | <input type="radio"/>             | <input type="radio"/>          |
| 7. Stop future plans for salt solution (open) salt mining                                              | <input type="radio"/> | <input type="radio"/>             | <input type="radio"/>          |
| 8. Stop exploitation of the Solotvyno mine and surrounding area                                        | <input type="radio"/> | <input type="radio"/>             | <input type="radio"/>          |
| 9. Stop exploitation of the recreation (Salt Lake) area                                                | <input type="radio"/> | <input type="radio"/>             | <input type="radio"/>          |
| 10. Stop pumping brine from abandoned mines into salt pools                                            | <input type="radio"/> | <input type="radio"/>             | <input type="radio"/>          |
| 11. Stop the use of salt resources (brine and rock salt) for health purposes (hospital: speleotherapy) | <input type="radio"/> | <input type="radio"/>             | <input type="radio"/>          |
| 12. Stop further construction in the Salt Lake zone                                                    | <input type="radio"/> | <input type="radio"/>             | <input type="radio"/>          |
| 13. Stop the pollution of the salt lakes                                                               | <input type="radio"/> | <input type="radio"/>             | <input type="radio"/>          |
| 14. Stop exploitation of alluvium in the Tisza River floodplain                                        | <input type="radio"/> | <input type="radio"/>             | <input type="radio"/>          |
| 15. Stop digging boreholes                                                                             | <input type="radio"/> | <input type="radio"/>             | <input type="radio"/>          |
| 16. Stop unregulated disposal of waste near collapses and sinkholes                                    | <input type="radio"/> | <input type="radio"/>             | <input type="radio"/>          |

#### Final Reflection

Q7.1. In your opinion, can the Solotvyno land be restored/rehabilitated/ cured?

- ☐ Yes
- ☐ No



☐ Maybe, please explain

Q7.2.  
Thank you for taking the time to complete this survey. We truly value the information you have provided. Your responses will help us identify the most effective solutions that may ensure that Solotvyno is safe. Please check for the report on the on [www.improdiret.eu](http://www.improdiret.eu), which will be available early 2020. If you have any comments on the survey or the project, please leave a comment below.

Powered by Qualtrics
